## Mimetics of extra virgin olive oil phenols with anti-cancer stem cell activity

Elisabet Cuyàs<sup>1,2</sup>, Juan Gumuzio<sup>3</sup>, Jesús Lozano-Sánchez<sup>4,5</sup>, Antonio Segura-Carretero<sup>4,6</sup>, Sara Verdura<sup>1,2</sup>, Joaquim Bosch-Barrera<sup>2,7,8</sup>, Begoña Martín-Castillo<sup>2,9</sup>, Alfons Nonell-Canals<sup>10,14</sup>, Amadeu Llebaria<sup>11</sup>, Silvia Cabello<sup>12</sup>, Carme Serra<sup>11,12</sup>, Melchor Sanchez-Martinez<sup>10,13</sup>, Ángel G. Martín<sup>3</sup>, Javier A. Menendez<sup>1,2</sup>

<sup>1</sup>Program Against Cancer Therapeutic Resistance (ProCURE), Metabolism and Cancer Group, Catalan Institute of Oncology, Girona, Spain

<sup>2</sup>Girona Biomedical Research Institute (IDIBGI), Girona, Spain

<sup>3</sup>StemTek Therapeutics, Bilbao, Spain

<sup>4</sup>Research and Development of Functional Food Centre (CIDAF), Granada, Spain

<sup>5</sup>Department of Food Science and Nutrition, University of Granada, Granada, Spain

<sup>6</sup>Department of Analytical Chemistry, University of Granada, Granada, Spain

<sup>7</sup>Medical Oncology, Catalan Institute of Oncology, Girona, Spain

<sup>8</sup>Department of Medical Sciences, Medical School University of Girona, Girona, Spain

<sup>9</sup>Unit of Clinical Research, Catalan Institute of Oncology, Girona, Spain

<sup>10</sup>Mind the Byte, Barcelona, Spain

<sup>11</sup>MCS, Laboratory of Medicinal Chemistry and Synthesis, Institute of Advanced Chemistry of Catalonia (IQAC-CSIC), Barcelona, Spain

<sup>12</sup>SIMChem, Synthesis of High Added Value Molecules, Institute of Advanced Chemistry of Catalonia (IQAC-CSIC), Barcelona, Spain

<sup>13</sup>Molomics, Barcelona Science Park, Barcelona, Spain

<sup>14</sup>Current address: The Patients Resource, Barcelona, Spain

**Correspondence to:** Javier A. Menendez; **email:** [jmenendez@idibgi.org](mailto:jmenendez@idibgi.org)

**Keywords:** olive oil, mTOR, DNMT, metabolism, epigenetics

**Received:** February 15, 2020

**Accepted:** September 24, 2020

**Published:** November 9, 2020

**Copyright:** © 2020 Cuyàs et al. This is an open access article distributed under the terms of the [Creative Commons Attribution License](https://creativecommons.org/licenses/by/3.0/) (CC BY 3.0), which permits unrestricted use, distribution, and reproduction in any medium, provided the original author and source are credited.

### ABSTRACT

The extra virgin olive oil (EVOO) dihydroxy-phenol oleacein is a natural inhibitor of multiple metabolic and epigenetic enzymes capable of suppressing the functional traits of cancer stem cells (CSC). Here, we used a natural product-inspired drug discovery approach to identify new compounds that phenotypically mimic the anti-CSC activity of oleacein. We coupled 3D quantitative structure-activity relationship-based virtual profiling with phenotypic analysis using 3D tumorsphere formation as a gold standard for assessing the presence of CSC. Among the top 20 computationally-predicted oleacein mimetics, four fulfilled the phenotypic endpoint of specifically suppressing the tumorsphere-initiating capacity of CSC, in the absence of significant cytotoxicity against differentiated cancer cells growing in 2D cultures in the same low micromolar concentration range. Of these, 3,4-dihydrophenetyl butyrate –a lipophilic ester conjugate of the hydroxytyrosol moiety of oleacein– and (*E*)-*N*-allyl-2-((5-nitrofuranyl)methylene)hydrazinecarbothioamide) –an inhibitor of *Trypanosoma cruzi* triosephosphate isomerase– were also highly effective at significantly reducing the proportion of aldehyde dehydrogenase (ALDH)-positive CSC-like proliferating cells. Preservation of the mTOR/DNMT binding mode of oleacein was dispensable for suppression of the ALDH<sup>+</sup>-CSC functional phenotype in hydroxytyrosol-unrelated

**mimetics. The anti-CSC chemistry of complex EVOO phenols such as oleacein can be phenocopied through the use of mimetics capturing its physico-chemical properties.**

## INTRODUCTION

Extra virgin olive oil (EVOO) is a unique functional food with a major contribution to the health-promoting effects of the so-called Mediterranean diet. EVOO contains a group of complex phenol-conjugated compounds named oleosidic secoiridoids or oleosides that exert nutritional and beneficial effects on major aging-driven diseases including cancer [1–10]. Using a holistic approach for phenotypic drug discovery coupled with mechanism-of-action functional profiling and target deconvolution, we recently identified the dihydroxy-phenol oleacein (the dialdehydic form of decarboxymethyl elenolic acid linked to hydroxytyrosol) [11–17] as a metabolo-epigenetic inhibitor of the mammalian target of rapamycin (mTOR) kinase and DNA methyltransferases (DNMTs). Oleacein was found to specifically and potently suppressing the functional traits of tumor-initiating cancer stem cells (CSC) in genetically diverse types of cancer cell populations [18].

The anti-CSC effects of oleacein are most likely related to its chemical structure, largely due to the presence of two hydroxyl groups in the hydroxytyrosol moiety [9, 19–21]. Therefore, one could envision that its scaffold might be used as a chemical prototype to facilitate selection and advancement of new anti-CSC hits via cell-based phenotypic screenings. However, a recent delineation of the high-level functions of oleacein in terms of biomolecular interactions, signaling pathways, and protein-protein interaction networks revealed that the so-called oleacein target landscape likely involved more than 700 proteins rather than solely mTOR and DNMTs [22]. Thus, although the ability of oleacein to operate as a multi-faceted regulator of numerous metabolic processes and chromatin-modifying enzymatic activities might open new horizons for CSC-targeted therapy based on the molecular bridge that connects metabolism and epigenetics with the aberrant state of stemness in cancer tissues [23–28], a biomimicry design process of oleacein mimetics remains a highly challenging task.

Here, we used a natural-product-inspired drug discovery approach to identify new small molecules capable of phenotypically mimicking the anti-CSC actions of oleacein. Using the structure of oleacein as a “seed”, we coupled 3D quantitative structure-activity relationship (3D-QSAR)-based virtual profiling (VP) with laboratory-based phenotypic testing using tumorsphere-formation potential as a gold standard for evaluating the

presence of CSC (Figure 1). We provide evidence that oleacein can be phenocopied through the use of mimetics with anti-CSC activity, which might guide the design of synthetically tractable small molecules capable of phenotypically imitating the anti-CSC chemistry of complex EVOO phenolics.

## RESULTS

### Computer-assisted discovery of oleacein mimetics

When a 2D similarity, ligand-based VP program was executed over the ChEMBL(v19) database using the Tanimoto coefficient and 2D (Morgan/circular) fingerprints, only the closely related secoiridoid molecule oleocanthal (ChEMBL2172394) was identified. The execution of a comparative molecular similarity indices analysis (CoMSIA)-based 3D VP program, however, identified several compounds with physico-chemical similarity scores greater than 0.75 (Figure 1). Taking advantage of the previously described binding modes of oleacein to mTOR and DNMT [18], we ran rigid-docking calculations to characterize the binding modes of the top 20 oleacein mimetics (Supplementary Figure 1), both at the crystallographic sites and at additional cavities occurring within the whole protein structures of mTOR and DNMT (Supplementary Tables 1–3). Table 1 summarizes the computationally-predicted oleacein mimetics ranked according to reweighted energies based on short molecular dynamics (MD) simulations followed by molecular mechanics with generalized Born and surface area solvation (MM/GBSA) calculations, for both the crystallographic and the best mTOR/DNMT cavities for each of the selected oleacein mimetics (Supplementary Tables 4 and 5).

### Binding modes of oleacein mimetics to mTOR and DNMT

The binding mode of oleacein to mTOR was predicted to share key amino acid residues with the binding modes of second-generation ATP-competitive TORKinhibitors and, consequently, partially mimicked the binding behavior of PP242 and Torin 2 to the ATP-binding catalytic pocket [18]. But, the presence of more aromatic rings in the oleacein molecule resulted in a slightly different binding strength from that of PP242 and Torin 2. Similarly, the presence of aromatic rings notably influenced the binding of the selected oleacein mimetics to mTOR (Figure 2). In fact, we predicted three different binding modes, one of them involving 5

oleacein mimetics that apparently shared the originally described binding mode of parental oleacein; and another two models encompassing 13 compounds and 2 compounds showing a binding mode closely resembling that of TORKinhibs (Figure 2). Rigid docking calculations originally predicted that  $\pi$ - $\pi$  stacking would occur between the aromatic ring of oleacein and the Trp2239 residue (or Tyr2225 upon conformational changes of either oleacein or the mTOR catalytic pocket itself) in the catalytic site of mTOR. MD simulations confirmed the main occurrence of  $\pi$ - $\pi$  stacking with Trp2239 (and a more fluctuating interaction with Tyr2225), as well as a significant number of additional residues providing key electrostatic interactions [18]. In the case of oleacein mimetics, it was evident that Trp2239, Tyr2225, and Phe2358 played a central role in

the stabilization of their respective complexes with mTOR (Supplementary Table 6).

The binding mode of oleacein to DNMT was predicted to closely resemble that of DNMT inhibitors such as 5-azacytidine, SGI-110, and curcumin [18]. In the case of oleacein mimetics, we were able to predict two different binding modes (Figure 3): one of them shared the oleacein pattern of spatial orientation and included 17 compounds and another one involved only 3 molecules (Figure 3). Rigid docking calculations and MD simulations predicted that the main residues involved in the stabilization of the oleacein-DNMT complex were Ser1446, Pro1125, Asp1143, Phe1145, Gly1150, Leu1151, Asn1158, Val1580, and Gly1223, along with a significant number of additional residues providing key electrostatic interactions. In the case of oleacein mimetics, Phe1145, Trp1170, Pro1224, and Pro1225 were predicted as the main catalytic residues (Supplementary Table 7).

### Oleacein mimetics specifically suppress CSC-driven mammosphere formation

To explicitly test the oleacein mimetics on CSC, we measured their effect on *in vitro* tumorsphere formation in low-density non-adherent serum-free medium supplemented with growth factors [29–35], considered one of the gold standards for evaluating CSC self-renewal activity. As a source of CSC, we used the CSC-enriched triple-negative breast cancer model MDA-MB-436, which can form smooth and round tumorspheres (mammospheres) in suspension culture [33]. The Cell2Sphere™ assay [18, 36, 37] was used to evaluate the differential ability of oleacein mimetics to specifically suppress the ability of CSC to survive and proliferate as floating 3D microtumors without promoting nonspecific, cytotoxic effects on the same cells grown in 2D adherent, differentiating conditions (Figure 4).

Using the focal adhesion kinase inhibitor VS-6063 (defactinib) [38–40] and the lysine-specific demethylase KDM1A inhibitor ORY-1001 (iadademstat) [37, 41] as mechanistically distinct anti-CSC compounds and selecting a 10  $\mu$ mol/L cut-off for 2D cytotoxicity (i.e., lower than the original IC<sub>50</sub> value of oleacein [18  $\pm$  5  $\mu$ mol/L] against CSC-driven mammosphere formation), 4 out of the 14 oleacein mimetics tested specifically suppressed mammosphere formation, namely CHEMBL1621113 (N'-[4-nitro-2-(trifluoromethyl)phenyl]propane-1,3-diamine), CHEMBL1632504 ((E)-N-allyl-2-((5-nitrofuran-2-yl)methylene)hydrazinecarbothioamide), CHEMBL126593 (N-(4-nitrobenzyl)ethane sulfonamide), and CHEMBL1950046 (3,4-dihydroxyphenethyl butyrate), while not exerting significant

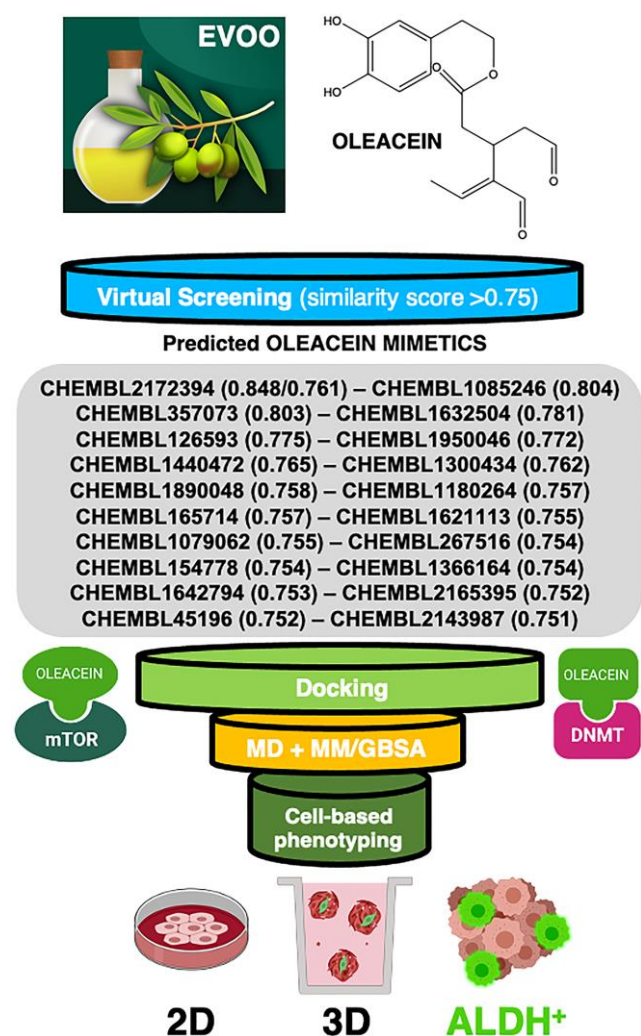

**Figure 1. Computer-assisted discovery of oleacein biomimetics with anti-CSC activity.** Schematic illustration of the computational framework coupled to laboratory-based phenotypic testing. The values in parentheses are similarity scores calculated with respect to parental oleacein.

**Table 1. MM/GBSA-based binding energy rescoring calculations over MD simulations of computationally-predicted oleacein mimetics.**

| Candidates ranked by<br>MM/GBSA energy<br>4JT6 (mTOR) | MM/GBSA energy<br>Crystallographic cavity /<br>Best cavity | Candidates ranked by<br>MM/GBSA energy<br>4WXX (DNMT) | MM/GBSA energy<br>Crystallographic cavity /<br>Best cavity |
|-------------------------------------------------------|------------------------------------------------------------|-------------------------------------------------------|------------------------------------------------------------|
| oleacein                                              | -26.8226 / -36.9331                                        | oleacein                                              | -30.567 / -36.5163                                         |
| CHEMBL1300434                                         | -38.7014 / -27.361                                         | CHEMBL1632504                                         | -38.2609 / -36.6319                                        |
| CHEMBL2143987                                         | -32.4070 / -40.3344                                        | CHEMBL2143987                                         | -36.4821 / -43.6863                                        |
| CHEMBL1545778                                         | -30.5493 / -25.0387                                        | CHEMBL2165395                                         | -33.4134 / -25.8227                                        |
| CHEMBL126593                                          | -29.2106 / -26.6329                                        | CHEMBL1300434                                         | -33.3421 / -33.9773                                        |
| CHEMBL1085246                                         | -27.4436 / -19.6725                                        | CHEMBL267516                                          | -32.8788 / -28.1508                                        |
| CHEMBL267516                                          | -27.3710 / -44.6454                                        | CHEMBL1180264                                         | -31.7196 / -32.3981                                        |
| CHEMBL45196                                           | -27.2624 / -17.1961                                        | CHEMBL357073                                          | -28.4676 / -27.0541                                        |
| CHEMBL1632504                                         | -25.7896 / -24.6272                                        | CHEMBL1440472                                         | -27.5899 / -29.3600                                        |
| CHEMBL357073                                          | -25.0102 / -33.5462                                        | CHEMBL1621113                                         | -26.6488 / -29.3269                                        |
| CHEMBL1366164                                         | -24.3303 / -17.8085                                        | CHEMBL1890048                                         | -26.0912 / -26.2952                                        |
| CHEMBL1642794                                         | -24.1435 / -19.439                                         | CHEMBL126593                                          | -25.7134 / -35.3592                                        |
| CHEMBL1621113                                         | -22.9663 / -21.0309                                        | CHEMBL45196                                           | -24.5175 / -32.1555                                        |
| CHEMBL1950046                                         | -20.2999 / -31.6794                                        | CHEMBL1950046                                         | -24.3167 / -21.7283                                        |
| CHEMBL2165395                                         | -19.8235 / -27.2639                                        | CHEMBL1079062                                         | -24.2025 / -24.4205                                        |
| CHEMBL1890048                                         | -19.6392 / -21.2089                                        | CHEMBL1545778                                         | -21.6215 / -22.9832                                        |
| CHEMBL2172394                                         | -18.4177 / -34.4392                                        | CHEMBL1085246                                         | -17.8140 / -21.8923                                        |
| CHEMBL1180264                                         | -18.2272 / -29.4140                                        | CHEMBL1642794                                         | -16.1264 / -20.6555                                        |
| CHEMBL1079062                                         | -17.4413 / -24.7585                                        | CHEMBL1366164                                         | -15.4957 / -19.6201                                        |
| CHEMBL1440472                                         | -16.6468 / -21.2853                                        | CHEMBL165714                                          | -12.1247 / -30.3770                                        |
| CHEMBL165714                                          | -16.1321 / -21.4634                                        | CHEMBL2172394                                         | -11.8887 / -31.0757                                        |

cytotoxic effects against differentiated cancer cells growing in 2D in the same low micromolar range (Figure 5). CHEMBL1085246 (*N*-(4-chloro-5-nitrothiazol-2-yl)hexanamide) exhibited anti-CSC activity due to unspecific cytotoxicity against CSC and non-CSC cells (Supplementary Figure 2).

#### Oleacein mimetics target ALDH<sup>+</sup> breast cancer stem cells

Oleacein selectively suppresses functional traits of CSC such as the expression of aldehyde dehydrogenase (ALDH) [18], a well-recognized marker of tumorigenic cell fractions enriched for proliferating, epithelial-like CSC capable of self-renewal [31, 32, 35, 42]. We next selected the 2 oleacein mimetics with the best CSC-targeted profile (i.e., anti-CSC activity at low micromolar range and lack of cytotoxic activity against differentiated cancer cells), namely CHEMBL1950046 (3,4-dihydroxyphenethyl butyrate; a.k.a. hydroxytyrosol butyrate) and CHEMBL1632504 (*(E)*-*N*-allyl-2-((5-nitrofuranyl)methylene)hydrazinecarbothioamide), to evaluate their capacity to target epithelial-like CSC cells with high levels of ALDH1 (ALDH1<sup>+</sup>). To do this, we used the Aldefluor<sup>®</sup> reagent, which quantifies ALDH activity by measuring the conversion of the ALDH substrate BODIPY aminoacetaldehyde to the fluorescent

product BODIPY aminoacetate (Figure 6A). Using HER2-overexpressing BT-474 cells as a breast cancer model naturally enriched with ALDH1<sup>+</sup> cells, we detected a significant decrease (up to 63% reduction) in the number of ALDH1<sup>+</sup> cells when BT-474 cells were treated with a non-cytotoxic concentration (10 μmol/L) of CHEMBL1950046 (hydroxytyrosol butyrate). A more pronounced effect was seen with CHEMBL1632504 (*(E)*-*N*-allyl-2-((5-nitrofuranyl)methylene)hydrazinecarbothioamide), which significantly decreased the proportion of ALDH1<sup>+</sup> cells from 40±2% in untreated BT-474 cells to levels as low as 2±1% (96% reduction). To corroborate the ability of oleacein mimetics to target ALDH1<sup>+</sup> epithelial-like CSC irrespective of the mutational landscape of cancer cells, we employed triple-negative MDA-MB-436 cells as a second breast cancer model naturally enriched with ALDH1<sup>+</sup> cells. Treatment with hydroxytyrosol butyrate decreased the ALDH1<sup>+</sup> cell content of MDA-MB-436 by approximately 40%. Remarkably, the large population of ALDH1<sup>+</sup> cells in untreated MDA-MB-436 cultures (42±8%) was drastically reduced by 93% (from 42±8% to 3±1%) in the presence of (*E*)-*N*-allyl-2-((5-nitrofuranyl)methylene)hydrazinecarbothioamide.

Preservation of the oleacein binding mode is required for a dual mTOR/DNMT inhibitory activity but not for

their anti-CSC behavior of oleacein mimetics. We finally evaluated whether the selected mimetics hydroxytyrosol butyrate and (*E*)-*N*-allyl-2-((5-nitrofuranyl)methylene)hydrazinecarbothioamide preserved the dual anti-mTOR/DNMT activity of the parental oleacein.

We first employed the FRET-based Z-LYTE™ Kinase Assay to test the ability of the selected oleacein mimetics to inhibit mTOR activity. Ten concentrations of hydroxytyrosol butyrate and (*E*)-*N*-allyl-2-((5-nitrofuranyl)methylene)hydrazinecarbothioamide spanning over five logarithmic decades were selected.

Figure 6B shows the mTOR activity rate as a function of oleacein mimetics concentration. Hydroxytyrosol butyrate inhibited mTOR activity with an IC<sub>50</sub> of ~39 μmol/L; (*E*)-*N*-allyl-2-((5-nitrofuranyl)methylene)hydrazinecarbothioamide was unable to decrease mTOR activity even at the maximum concentration tested.

We finally carried out a radioisotope-based methyltransferase profiling measuring the DNMT3A-catalyzed incorporation of S-adenosyl-L[methyl-<sup>3</sup>H]methionine (SAM[<sup>3</sup>H]) into DNA (DNA 5-[methyl-<sup>3</sup>H]-cytosine) in the absence or presence of oleacein

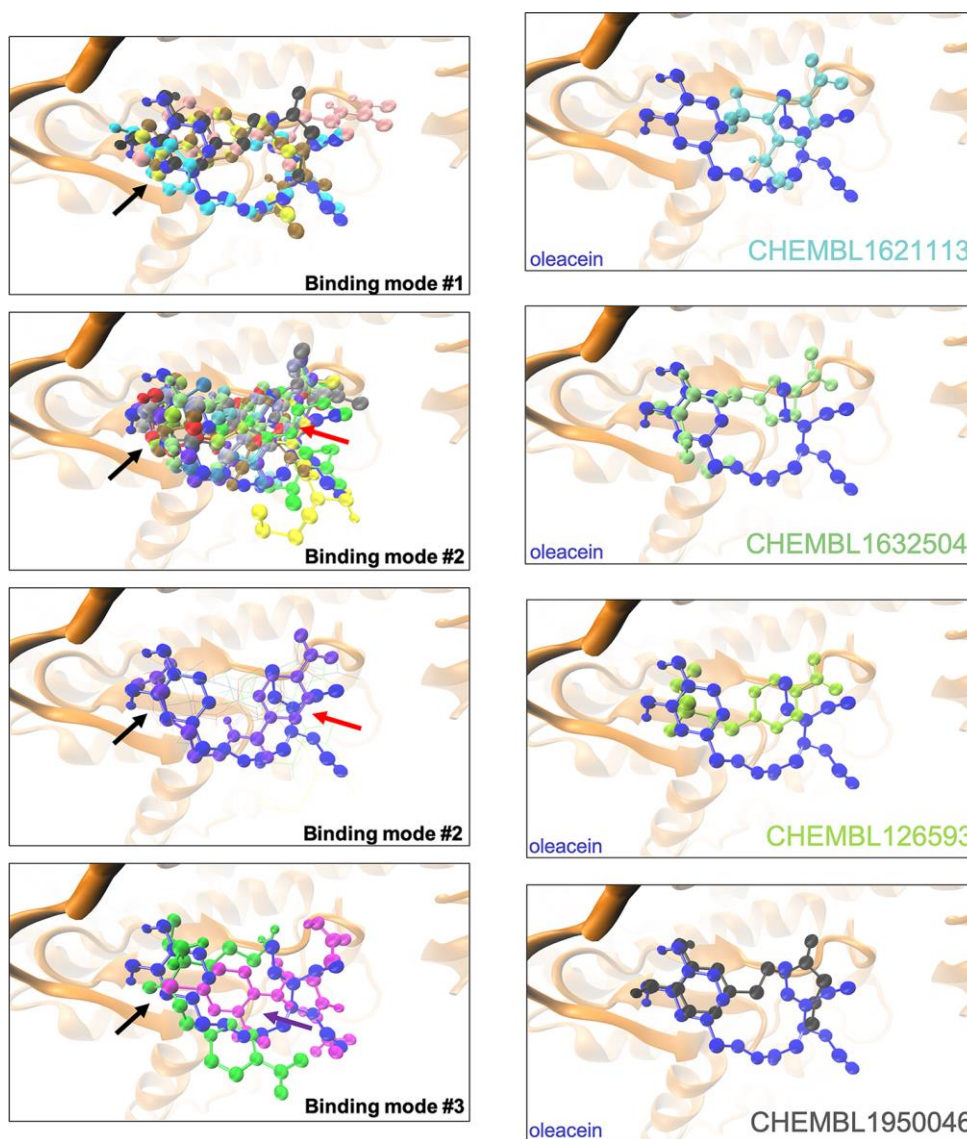

**Figure 2. Binding modes of oleacein mimetics to mTOR.** *Left panels.* Graphical representation of the binding modes of the computationally-predicted oleacein mimetics to the catalytic cavity of mTOR. The black, red, and purple arrows indicate the location of the aromatic rings in the binding modes #1, #2, and #3, respectively. *Right panels.* Graphical representation of the binding modes of parental oleacein and selected oleacein mimetics with anti-CSC activity (Figure 4, 5) to the catalytic cavity of mTOR.

mimetics. The selected oleacein mimetics were tested in 10-dose  $IC_{50}$  mode with 2-fold serial dilution and reactions were carried out at 1  $\mu\text{mol/L}$  SAM. Although hydroxytyrosol butyrate decreased DNMT3A activity in a dose-dependent manner, concentrations higher than 150  $\mu\text{mol/L}$  were necessary to reach the  $IC_{50}$  value. (*E*)-*N*-allyl-2-((5-nitrofuranyl)methylene)hydrazinecarbothioamide did not reach the half maximal inhibitory concentration of DNMT3a activity even at the highest concentration tested.

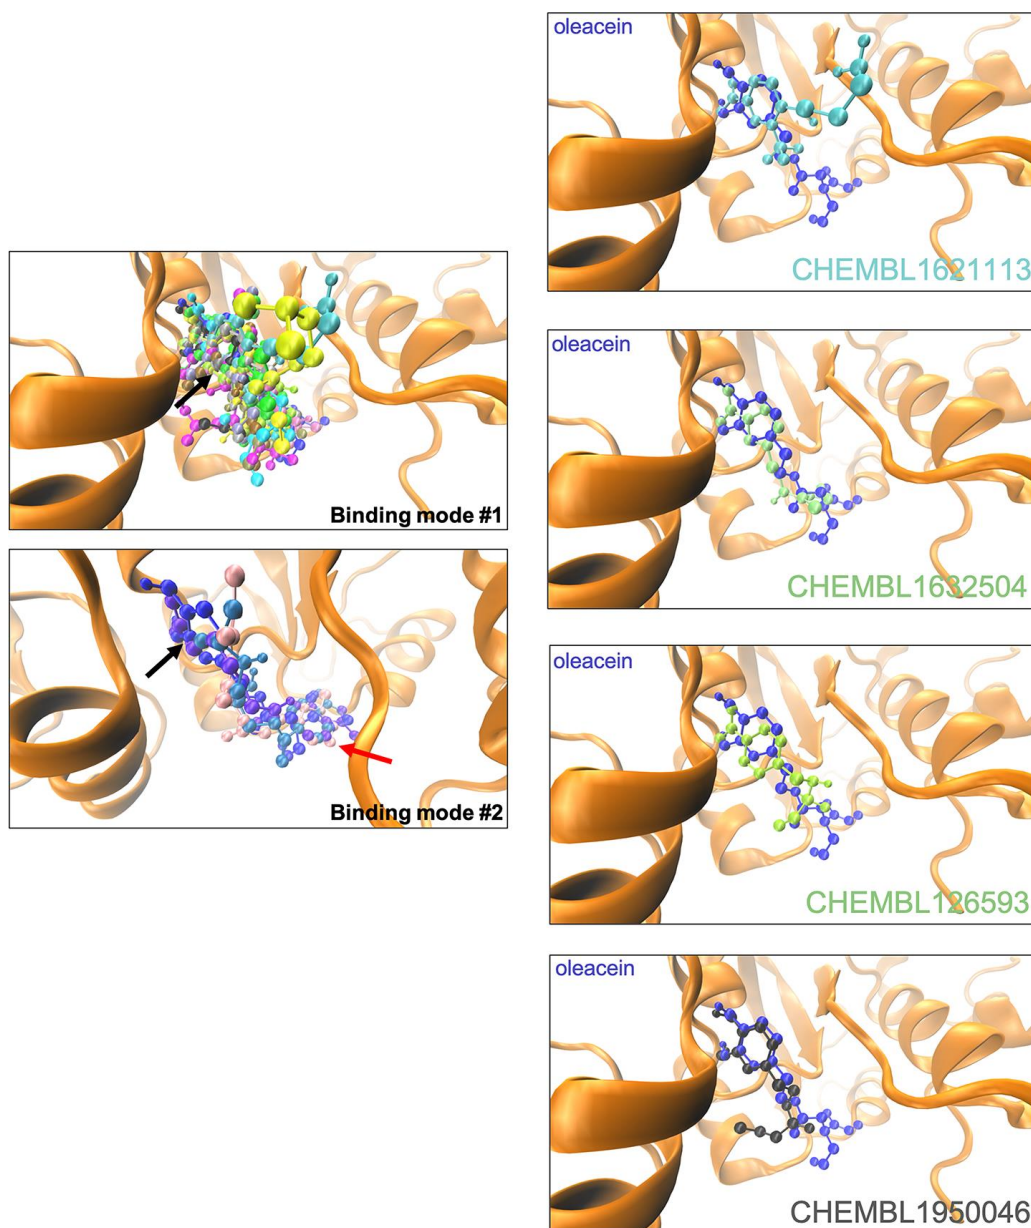

**Figure 3. Binding modes of oleacein mimetics to DNMT.** *Left panels.* Graphical representation of the binding modes of the computationally-predicted oleacein mimetics to the catalytic site of DNMT. The black and red arrows indicate the location of the aromatic rings in the binding modes #1 and #2, respectively. *Right panels.* Graphical representation of the binding modes of parental oleacein and selected oleacein mimetics with anti-CSC activity (Figures 4 and 5) to the catalytic cavity of DNMT.

## DISCUSSION

The molecular frameworks of natural products can provide feasible and innovative templates for medicinal chemistry and drug discovery [43]. But, despite the long tradition of natural product-inspired discovery of synthetic compounds, there has been little effort to utilize EVOO biophenols chemotypes as a springboard for lead discovery. Here, we carried out such a drug discovery approach to uncover new compounds capable

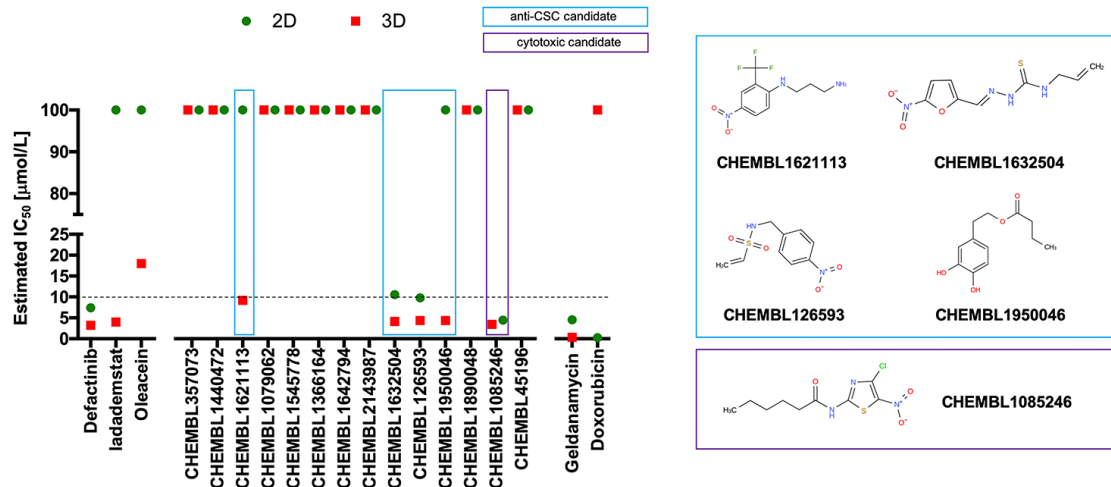

**Figure 4. Phenotypic screening of the anti-CSC activity of oleacein mimetics (I).** *Left.* Comparative analysis of IC<sub>50</sub> values of the computationally-predicted oleacein mimetics in 2D monolayer cultures and 3D mammosphere systems. With 10 µmol/L as a cutoff, 4/16 compounds tested were more potent in 3D than in 2D and were selected as anti-CSC candidates; 1/16 compounds tested was equally potent in 3D and in 2D and was designated as cytotoxic. *Right.* ChEMBL structures of the computationally-predicted oleacein mimetics with anti-CSC (blue box) and cytotoxic (red box) activity.

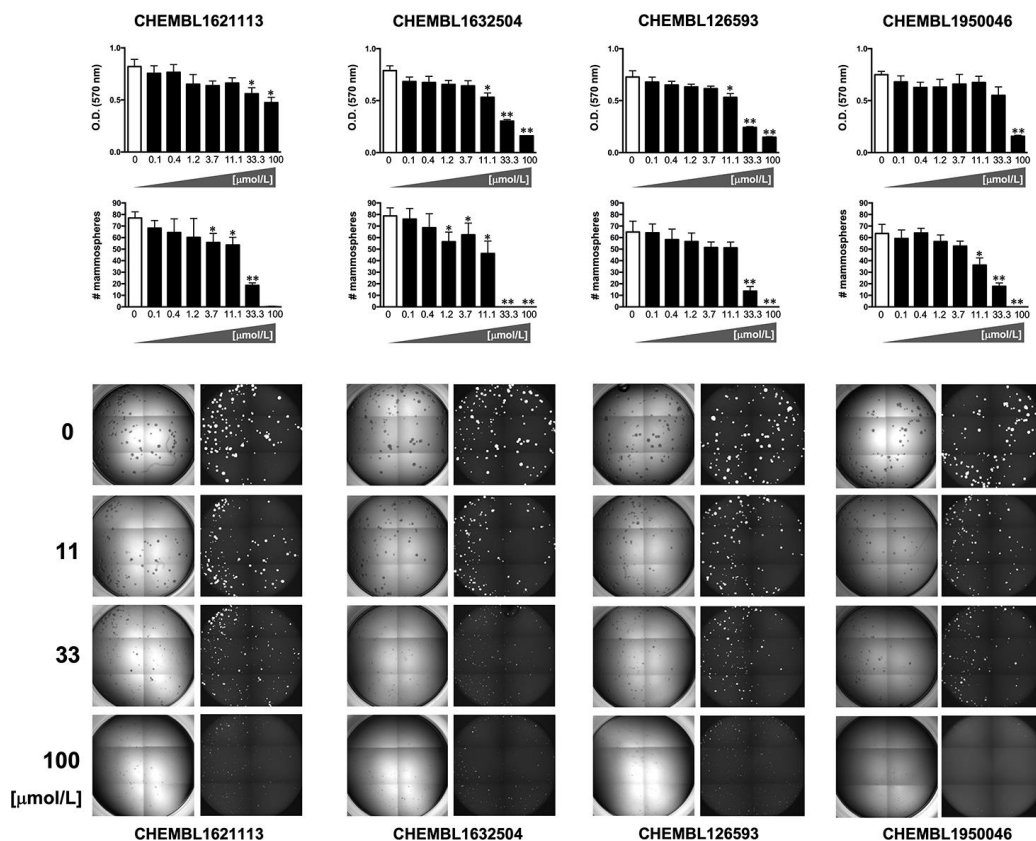

**Figure 5. Phenotypic screening of the anti-CSC activity of oleacein mimetics (II).** *Top panels.* MTT reduction-based measurement of cell viability is expressed as percentage uptake (OD<sub>570</sub>) relative to untreated controls (=100% cell viability). *Bottom panels.* Representative microscope images (×2.5 magnification) of mammospheres formed by MDA-MB-436 cells growing in sphere medium for 6 days in the absence or presence of graded concentrations of oleacein mimetics. The number of mammospheres (>100 µm diameter) is expressed as means (columns) ± SD (bars). \*P < 0.05 and \*\*P < 0.005, statistically significant differences from the untreated (control) group.

of phenotypically mimicking the anti-CSC effects of the EVOO dihydroxy-phenol oleacein.

We took advantage of modern bioinformatics approaches with the aim of identifying physicochemical mimetics of the anti-CSC behavior of EVOO-derived oleacein. First, the somewhat structurally complex framework of the dialdehydic form of decarboxymethyl elenolic acid linked to hydroxytyrosol (i.e., oleacein) was computationally captured in terms of molecules with oleacein-like physico-chemical profiles. Second, we *in silico* compared the binding modes of the top 20 computationally-predicted oleacein mimetics to the two molecular targets originally involved in the capacity of oleacein to specifically suppress the functional traits of tumor-initiating CSC (i.e., mTOR and DNMT) [14]. Third, we phenotypically explored the computationally-discovered oleacein biomimetics in terms of their anti-CSC activity. Fourth, we evaluated the structure-mTOR/DNMT bioactivity relationship of the most promising oleacein-mimetic candidates. By doing so,

four oleacein mimetics, namely N'-[4-nitro-2-(trifluoromethyl)phenyl]propane-1,3-diamine, (*E*)-*N*-allyl-2-((5-nitrofuran-2-yl)methylene)hydrazinecarbothioamide, *N*-(4-nitrobenzyl)ethanesulfonamide, and 3,4-dihydroxyphenethyl butyrate (a.k.a. hydroxytyrosol butyrate), fulfilled the first phenotypic endpoint of the selection criteria, which was the specific suppression of the 3D mammosphere forming capability of CSC in the low micromolar range without highly significant cytotoxic effects against differentiated cancer cells growing in 2D cultures in the same range of concentrations. Moreover, non-cytotoxic concentrations of the oleacein mimetics hydroxytyrosol butyrate and (*E*)-*N*-allyl-2-((5-nitrofuran-2-yl)methylene)hydrazine carbothioamide efficiently suppressed the population of ALDH1<sup>+</sup> epithelial-like proliferating CSC [31, 32, 35, 42], a second phenotypic endpoint of the selection criteria for anti-CSC candidates.

The fact that the oleacein mimetics-responsive phenotypes were exclusively manifested under 3D stem

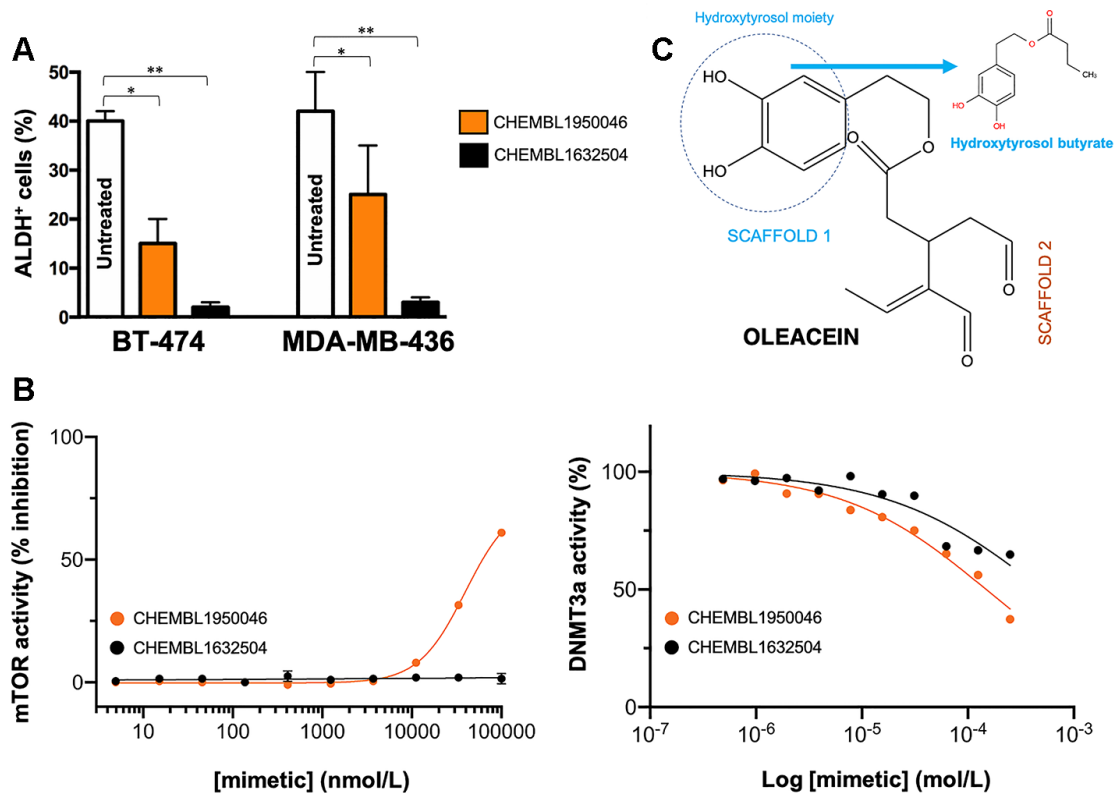

**Figure 6. Phenotypic screening of the anti-CSC activity of oleacein mimetics (III).** (A) Changes in the number of ALDH<sup>+</sup> cells in BT-474 and MDA-MB-436 populations cultured in the absence or presence of 11.1 μmol/L of CHEMBL1950046 and CHEMBL1632504. The results are expressed as percentages means (columns) ± SD (bars). \**P* < 0.05 and \*\**P* < 0.005, statistically significant differences from the untreated (control) group. (B) *Left*. A dose-response inhibition curve of ATP-dependent activity of mTOR kinase was created by plotting FRET signal of the Z'-LYTE Kinase assay as the function of CHEMBL1950046 and CHEMBL1632504 concentrations. *Right*. Dose-response curves of SAM-dependent methylation activity of DNMT3A were created by plotting radioisotope signals of the HotSpot<sup>SM</sup> assay as the function of CHEMBL1950046 and CHEMBL1632504 concentrations. (C) Molecular scaffolds of oleacein.



cell culture conditions along with their capacity to specifically and potently suppress (>90%) ALDH<sup>+</sup> CSC-like cellular states irrespective of the mutational landscape of the cancer cell population strongly suggested that their mechanism of action targets the biological functioning of cancer stemness *per se*. Hydroxytyrosol butyrate is a chemically-modified (alkyl ester) lipophilic version of hydroxytyrosol that is more stable than parental hydroxytyrosol under biological conditions [44–49]. The fact that the inclusion of a short-medium lipophilic chain in the hydroxytyrosol molecule sufficed to recapitulate, at least in part, both the anti-CSC behavior and the anti-mTOR/DNMT inhibitory activity of the parental oleacein highlights the functional relevance of the dihydroxybenzene moiety within the phenolic part of oleacein, a scaffold that seems to be a crucial mediator of the metabolo-epigenetic modulatory effects of oleacein (e.g., COMT, IDH1, LSD1 [18, 22, 50–52]) *via* formation of stacking interactions, coordination with metal ions, and/or establishment of hydrophobic and/or hydrogen bond interactions through the hydroxyl groups or the aromatic ring (Figure 6C). The second oleacein scaffold, which comprises the secoiridoid dialdehyde part, might be involved in the stabilization of oleacein *via* hydrophobic interactions within the binding pocket of the targeted proteins. Accordingly, although hydroxytyrosol butyrate preserved the original double occupancy of oleacein within the catalytic sites of mTOR and DNMT, the sole dihydroxybenzene moiety does not suffice to fully preserve the low-micromolar biological activity of oleacein against mTOR and DNMT enzymatic activities. (*E*)-*N*-allyl-2-((5-nitrofuranyl)methylene)hydrazinecarbothioamide, originally described as an inhibitor of the *Trypanosoma cruzi* triosephosphate isomerase [53], lacked the original binding sites of oleacein to mTOR and DNMT, thereby fully losing the original ability of oleacein to operate as a dual mTOR/DNMT inhibitor. (*E*)-*N*-allyl-2-((5-nitrofuranyl)methylene)hydrazinecarbothioamide, however, appeared to operate as an optimized mimetic of oleacein capable of exhibiting a very promising and potent activity against ALDH<sup>+</sup>-positive breast CSC. These findings can be consistent with the notion that preservation of the original binding mode of oleacein to mTOR and DNMT is an obligatory requirement for a dual mTOR/DNMT inhibitory activity of hydroxytyrosol-related oleacein mimetics (e.g., hydroxytyrosol butyrate) with anti-CSC activity; for hydroxytyrosol-unrelated oleacein mimetics (e.g., (*E*)-*N*-allyl-2-((5-nitrofuranyl)methylene)hydrazinecarbothioamide), however, the absence of a dual mTOR/DNMT inhibitory activity is dispensable for an efficient suppression of the ALDH<sup>+</sup>-CSC functional phenotype.

We provide, to the best of our knowledge, the first evidence that the pharma-nutritional properties of oleacein that elicit its functioning as an anti-CSC

compound can be phenocopied through the use of mimetics that capture its physico-chemical properties. Although we acknowledge that further studies are needed to validate the ability of oleacein mimetics to functionally deplete tumor-initiating CSC-like states *in vivo* and the mechanisms underlying their mode of action, it is reasonable to suggest that a biomimicry design process might guide the development of synthetically tractable small molecules capable of phenotypically imitating the anti-CSC chemistry of complex EVOO phenolics such as oleacein.

## MATERIALS AND METHODS

### Preparation and analytical characterization of oleacein mimetics

#### **CHEMBL2143987** (*N*-2-(*N*-Dimethylamino)ethyl)-2-(4-nitrophenyl)acetamide)

A mixture of 4-nitrophenylacetic acid (100 mg, 0.552 mmol) and CDI (94mg, 0.58 mmol) in DMF (1.4 mL) was stirred at 50° C for 10 min. The solution was cooled to 20° C, *N,N*-dimethylaminoethylamine (63.6 μL, 0.58 mmol) was added dropwise and the solution stirred for 2 h. The solution was poured into water and extracted with EtOAc (3×). The combined organic extracts were washed with water, brine, dried, and the solvent removed under reduced pressure. The residue was chromatographed, eluting with a DCM/MeOH (1%NH<sub>3</sub>) yielding *N*-(*N,N*-dimethylaminoethyl)-2-4-nitrophenylacetamide (27 mg, 19.5%).

#### **CHEMBL1632504** ((*E*)-*N*-Allyl-2-((5-nitrofuranyl)methylene)hydrazinecarbothioamide)

5-Nitrofuranyl-2-carbaldehyde (100 mg, 0.709 mmol), *N*-allylhydrazinecarbothioamide (93 mg, 0.709 mmol), *p*-TSA (6.74 mg, 0.035 mmol) and toluene (7.0 mL) were stirred at room temperature until the aldehyde was not present (1.5h). The solid formed (136 mg, 75%) was collected by filtration.

#### **CHEMBL126593** (*N*-(4-Nitrobenzyl)ethanesulfonamide)

4-Nitrophenylmethanamine (100 mg, 0.657 mmol) was dissolved in DCM (620 μL, dry) at 0° C with stirring under N<sub>2</sub> to which a 4-methylmorpholine (145 μL, 1.314 mmol) was added with stirring. A solution of *γ*-2-chloroethanesulfonyl chloride (68.7 μL, 0.657 mmol) dissolved in DCM (620 μL, dry) was added at 0° C with stirring 10 min under N<sub>2</sub>, after which time the reaction mixture was stirred at room temperature overnight. The reaction mixture was extracted with dilute hydrochloric acid and the organic layers were collected, dried (MgSO<sub>4</sub>), filtered and the solvent removed under reduced pressure. The crude product

was purified by column chromatography (EtOAc/n-hexane 1/2). The product was obtained as a white solid (11 mg, 7%).

**CHEMBL1950046 (3,4-Dihydroxyphenethyl butyrate)**

Lipase P (25 mg) and vinyl butyrate (412  $\mu$ l, 3.24 mmol) were added to a solution of 4-(2-hydroxyethyl)benzene-1,2-diol (25 mg, 0.162 mmol) in *t*BuOMe (Volume: 5792  $\mu$ l) and the mixture was shaken at 40° C for 60 min. The reaction was quenched by filtering off enzyme and the filtrate was evaporated *in vacuo*. The resulting residue was dissolved in EtOAc and washed with sat. NaHCO<sub>3</sub> and brine then dried (MgSO<sub>4</sub>) followed by filtration and evaporation to dryness. 32 mg (89%) of compound identified as the title compound were obtained.

**CHEMBL1890048 (2-Methoxy-N-(2-methyl-5-nitrophenyl)acetamide)**

To a solution of 2-methyl-5-nitroaniline (100 mg, 0.657 mmol) in DCM (0.04 M), TEA (0.137 ml, 0.986 mmol) and 2-methoxyacetyl chloride (0.066  $\mu$ l, 0.723 mmol) were added. The reaction mixture was stirred at room temperature for 4 h. 103 mg (70%) of compound identified as the title compound were obtained.

**CHEMBL1085246 (N-(4-Chloro-5-nitrothiazol-2-yl)hexanamide)**

Hexanoyl chloride (38.2  $\mu$ l, 0.278 mmol) was dissolved in THF (0.1 M) and cooled to -78° C then 4-chloro-5-nitrothiazol-2-amine (50 mg, 0.278 mmol) was added in one portion. DIPEA (1.1 eq) was added to the resulting slurry at -78° C and the solution was held at this temperature for 10 min then allowed to warm to room temperature overnight. The solution was diluted with EtOAc and washed with sat. NaHCO<sub>3</sub>, 1M HCl and brine then dried (MgSO<sub>4</sub>) followed by filtration and evaporation to dryness. The resulting residue was purified by gradient flash column chromatography (10-60% EtOAc/hexanes or 1-2% MeOH/CH<sub>2</sub>Cl<sub>2</sub>) to obtain 22 mg (28.5%) of compound identified as the title compound.

**CHEMBL45196 (4-((5-Chloro-2-nitrophenyl)amino)-4-oxo-2-(2,2,2-trifluoroacetamido)butanoic acid)**

A mixture of 5-chloro-2-nitroaniline (50 mg, 0.290 mmol) and (*S*)-*N*-(2,5-dioxotetrahydrofuran-3-yl)-2,2,2-trifluoroacetamide (61.2 mg, 0.290 mmol) was irradiated for 60 minutes in a microwave (130° C, 200 psi, 200W). The residue was purified by reversed-phase flash chromatography, yielding 14 mg (12%) of compound identified as the title compound.

CHEMBL357073 (6-[(4-nitrophenyl)formamido]hexanoic acid), CHEMBL1545778 ([2-(methylcarbamoylamino)-2-oxo-ethyl] (E)-3-(3-bromophenyl)prop-2-

enoate), CHEMBL1366164 (ethyl 2-[(2-methyl-5-nitrophenyl)amino]-2-oxoacetate), and CHEMBL1642794 ([2-(tert-butylamino)-2-oxo-ethyl] 4-nitrobenzoate) were purchased from Enamine (EN300-302808, Z1864 6098, EN300-236023, and Z19756482, respectively; Kiev, Ukraine). CHEMBL1440472 (2-[(6-chloro-3-nitro-2-pyridinyl)amino]-3-methylbutanoic acid) was purchased from Key Organics (MS-1625; Bedford, MA). CHEMBL1621113 (N-[4-nitro-2-(trifluoromethyl)phenyl]propane-1,3-diamine) and CHEMBL1079062 ((*Z*)-4-[(4-nitrophenyl)amino]-4-oxobut-2-enoic acid) were purchased from ABCR GmbH (AB141160 and AB414326, respectively; Karlsruhe, Germany).

**Analytical and spectroscopic characterization of oleacein mimetics**

**NMR**

NMR spectra were recorded on an Agilent VNMRS-400 (<sup>1</sup>H at 400.10 MHz). **HPLC-MS.** HPLC-MS were performed with a High-Performance Liquid Chromatography Thermo Ultimate 3000SD (Thermo Scientific Dionex) coupled to a photodiode array detector and a mass spectrometer LTQ XL ESI-ion trap (Thermo Scientific); 5 $\mu$ l of sample MeOH were injected (c=0.5mg/mL). Data from mass spectra were analyzed by electrospray ionization in positive and negative mode and peaks are given m/z (% of basis peak). The mobile phase used was a mixture of A = water + 0.05 formic acid and B = Acetonitrile + 0.05 formic acid with method described as follows: flow 0.5 mL/min; 5% B for 0.5 min; 5%-100% B in 5 min, 100% B for 2min.

**Virtual screening**

Virtual profiling was performed with ligand- and structure-based software tools, using the chemical structure of oleacein as a seed, as described [54]. Briefly, the 3D virtual profiling tool compares a query molecule (i.e., oleacein) with the structures present in the ChEMBL(v19) reference database using Comparative Molecular Similarity Indices Analysis (CoMSIA) fields on a 3D grid. Molecules were compared according to their relationship with their environment using the 3D descriptors topologic surface area, lipophilicity, hydrogen bond donors/acceptors count, and Van der Waals radii, among others, thereby obtaining biomimetic compounds with different structures.

**Docking and molecular dynamics calculations**

All docking, MD calculations and MM/GBSA rescoring were carried out as described [18, 22, 54].

## Cell viability

Cell viability was determined using a standard colorimetric MTT-based reduction assay 72 h after exposure to graded concentrations of oleacein mimetics.

## Mammosphere formation

Mammosphere formation was monitored using Cell2Sphere™ assays (StemTek Therapeutics, Bilbao, Spain). Graded concentrations of oleacein mimetics were added to triplicate sets of wells on day 1 and the number of 6-day-old mammospheres was recorded as a measurement of CSC content. Images were recorded using a BioTek Cytation 5 image cytometer at 2.5× magnification. Prior to image acquisition, spheroid cultures were stained with a fluorescent vital dye to increase the accuracy of spheroid detection and analysis. The system was then set to count number, size, and aspect ratio of the objects. Thresholds were set to >100 µm in size and 0.4 as aspect ratio (with 1 being the aspect ratio of a perfect circle).

## Aldefluor activity assay

The ALDEFLUOR® assay (StemCell Technologies, Vancouver, BC, Canada) was performed with or without the addition of hydroxytyrosol butyrate and (*E*)-*N*-allyl-2-((5-nitrofuranyl)methylene)hydrazinecarbothioamide for 48 h.

## mTOR and DNMT activity/inhibition assays

IC<sub>50</sub> determinations for FRAP1 (mTOR) of oleacein mimetics were outsourced to Invitrogen (Life Technologies) using the FRET-based Z-LYTE™ SelectScreen Kinase Profiling Service. The effect of oleacein mimetics on the enzymatic activities of the recombinant human DNMT3A was outsourced to Reaction Biology Corp. (Malvern, PA) using HotSpot<sup>SM</sup>, a nanoliter-scale radioisotope filter binding platform.

## Statistical analysis

All statistical analyses were performed using GraphPad Prism software (San Diego, CA). Data are presented as mean ± S.D. Comparisons of means of ≥ 3 groups were performed by analysis of variance (ANOVA) and the existence of individual differences, in case of significant *F* values at ANOVA, were assessed by multiple contrasts. *P* values < 0.05 and <0.005 were considered to be statistically significant (denoted as \* and \*\*, respectively). All statistical tests were two-sided.

## AUTHOR CONTRIBUTIONS

J.A.M. conceived the idea, directed the project, and wrote the manuscript. E. C., J.G., S. V., and A. G. M. were involved in the design, development, and analysis of all the cell-based and enzymatic experiments, and analyzed the data. J. B-B. and B. M-C. provided intellectual insights and critically read the manuscript. J. L-S. and A. S-C. provided essential materials necessary for the study. A. N-C. and M. S-M. performed virtual profiling, docking and molecular dynamics-based calculations and scorings, and examined all the chemoinformatic data. A. L., S. C., and C. S. performed chemical synthesis and analytical characterization of oleacein mimetics.

## ACKNOWLEDGMENTS

The authors would like to thank Dr. Kenneth McCreath for editorial support.

## CONFLICTS OF INTEREST

Stock ownership: Á.G.M., StemTek Therapeutics (CEO). All other authors have no competing interests to declare. The authors declare that the research was conducted in the absence of any commercial or financial relationships that could be construed as a potential conflict of interest. Ethics approval was not required for this study as per the local legislation.

## FUNDING

Work in the Menendez laboratory is supported by the Spanish Ministry of Science and Innovation (Grants SAF2016-80639-P and PID2019-104055GB-I00, Plan Nacional de I+D+I, funded by the European Regional Development Fund, Spain) and by an unrestricted research grant from the Fundació Oncolliga Girona (Lliga catalana d'ajuda al malalt de càncer, Girona). Joaquim Bosch-Barrera is the recipient of research grants from La Marató de TV3 foundation (201906) and the Health Research and Innovation Strategic Plan (SLT006/17/114; PERIS 2016-2020; Pla estratègic de recerca i innovació en salut; Departament de Salut, Generalitat de Catalunya).

## REFERENCES

1. López-Miranda J, Pérez-Jiménez F, Ros E, De Caterina R, Badimón L, Covas MI, Escrich E, Ordovás JM, Soriguer F, Abiá R, de la Lastra CA, Battino M, Corella D, et al. Olive oil and health: summary of the II international conference on olive oil and health consensus report, Jaén and Córdoba (Spain) 2008. *Nutr Metab Cardiovasc Dis.* 2010; 20:284–94.

- <https://doi.org/10.1016/j.numecd.2009.12.007>  
PMID:20303720
2. Menendez JA, Joven J, Aragonès G, Barrajón-Catalán E, Beltrán-Debón R, Borrás-Linares I, Camps J, Corominas-Faja B, Cufí S, Fernández-Arroyo S, García-Heredia A, Hernández-Aguilera A, Herranz-López M, et al. Xenohormetic and anti-aging activity of secoiridoid polyphenols present in extra virgin olive oil: a new family of gerosuppressant agents. *Cell Cycle*. 2013; 12:555–78.  
<https://doi.org/10.4161/cc.23756> PMID:23370395
  3. Fernández del Río L, Gutiérrez-Casado E, Varela-López A, Villalba JM. Olive oil and the hallmarks of aging. *Molecules*. 2016; 21:163.  
<https://doi.org/10.3390/molecules21020163>  
PMID:26840281
  4. Reboredo-Rodríguez P, Varela-López A, Forbes-Hernández TY, Gasparrini M, Afrin S, Cianciosi D, Zhang J, Manna PP, Bompadre S, Quiles JL, Battino M, Giampieri F. Phenolic compounds isolated from olive oil as nutraceutical tools for the prevention and management of cancer and cardiovascular diseases. *Int J Mol Sci*. 2018; 19:2305.  
<https://doi.org/10.3390/ijms19082305>  
PMID:30082650
  5. Gaforio JJ, Visioli F, Alarcón-de-la-Lastra C, Castañer O, Delgado-Rodríguez M, Fitó M, Hernández AF, Huertas JR, Martínez-González MA, Menendez JA, Osada J, Papadaki A, Parrón T, et al. Virgin olive oil and health: summary of the III international conference on virgin olive oil and health consensus report, JAEN (Spain) 2018. *Nutrients*. 2019; 11:2039.  
<https://doi.org/10.3390/nu11092039> PMID:31480506
  6. Serreli G, Deiana M. Biological relevance of extra virgin olive oil polyphenols metabolites. *Antioxidants (Basel)*. 2018; 7:170.  
<https://doi.org/10.3390/antiox7120170>  
PMID:30469520
  7. Nediani C, Ruzzolini J, Romani A, Calorini L. Oleuropein, a bioactive compound from *Olea europaea* L., as a potential preventive and therapeutic agent in non-communicable diseases. *Antioxidants (Basel)*. 2019; 8:578.  
<https://doi.org/10.3390/antiox8120578>  
PMID:31766676
  8. Romani A, Ieri F, Urciuoli S, Noce A, Marrone G, Nediani C, Bernini R. Health effects of phenolic compounds found in extra-virgin olive oil, by-products, and leaf of *Olea europaea* L. *Nutrients*. 2019; 11:1776.  
<https://doi.org/10.3390/nu11081776> PMID:31374907
  9. Rodríguez-López P, Lozano-Sanchez J, Borrás-Linares I, Emanuelli T, Menéndez JA, Segura-Carretero A. Structure-biological activity relationships of extra-virgin olive oil phenolic compounds: health properties and bioavailability. *Antioxidants (Basel)*. 2020; 9:685.  
<https://doi.org/10.3390/antiox9080685>  
PMID:32752213
  10. Serreli G, Deiana M. Extra virgin olive oil polyphenols: modulation of cellular pathways related to oxidant species and inflammation in aging. *Cells*. 2020; 9:478.  
<https://doi.org/10.3390/cells9020478>  
PMID:32093046
  11. Corominas-Faja B, Santangelo E, Cuyàs E, Micol V, Joven J, Ariza X, Segura-Carretero A, García J, Menendez JA. Computer-aided discovery of biological activity spectra for anti-aging and anti-cancer olive oil oleuropeins. *Aging (Albany NY)*. 2014; 6:731–41.  
<https://doi.org/10.18632/aging.100691>  
PMID:25324469
  12. Vougiogiannopoulou K, Lemus C, Halabalaki M, Pergola C, Werz O, Smith AB 3r, Michel S, Skaltsounis L, Deguin B. One-step semisynthesis of oleacein and the determination as a 5-lipoxygenase inhibitor. *J Nat Prod*. 2014; 77:441–45.  
<https://doi.org/10.1021/np401010x>  
PMID:24568174
  13. Lombardo GE, Lepore SM, Morittu VM, Arcidiacono B, Colica C, Procopio A, Maggisano V, Bulotta S, Costa N, Mignogna C, Britti D, Brunetti A, Russo D, Celano M. Effects of oleacein on high-fat diet-dependent steatosis, weight gain, and insulin resistance in mice. *Front Endocrinol (Lausanne)*. 2018; 9:116.  
<https://doi.org/10.3389/fendo.2018.00116>  
PMID:29615982
  14. Polini B, Digiacomio M, Carpi S, Bertini S, Gado F, Saccomanni G, Macchia M, Nieri P, Manera C, Fogli S. Oleocanthal and oleacein contribute to the in vitro therapeutic potential of extra virgin oil-derived extracts in non-melanoma skin cancer. *Toxicol In Vitro*. 2018; 52:243–50.  
<https://doi.org/10.1016/j.tiv.2018.06.021>  
PMID:29959992
  15. Celano M, Maggisano V, Lepore SM, Russo D, Bulotta S. Secoiridoids of olive and derivatives as potential adjuvant drugs in cancer: a critical analysis of experimental studies. *Pharmacol Res*. 2019; 142:77–86.  
<https://doi.org/10.1016/j.phrs.2019.01.045>  
PMID:30772463
  16. Karković Marković A, Torić J, Barbarić M, Jakobušić Brala C. Hydroxytyrosol, tyrosol and derivatives and their potential effects on human health. *Molecules*. 2019; 24:2001.  
<https://doi.org/10.3390/molecules24102001>  
PMID:31137753

17. Lozano-Castellón J, López-Yerena A, Rinaldi de Alvarenga JF, Romero Del Castillo-Alba J, Vallverdú-Queralt A, Escribano-Ferrer E, Lamuela-Raventós RM. Health-promoting properties of oleocanthal and oleacein: two secoiridoids from extra-virgin olive oil. *Crit Rev Food Sci Nutr*. 2020; 60:2532–48. <https://doi.org/10.1080/10408398.2019.1650715> PMID:[31423808](https://pubmed.ncbi.nlm.nih.gov/31423808/)
18. Corominas-Faja B, Cuyàs E, Lozano-Sánchez J, Cufí S, Verdura S, Fernández-Arroyo S, Borrás-Linares I, Martín-Castillo B, Martín ÁG, Lupu R, Nonell-Canals A, Sanchez-Martinez M, Micol V, et al. Extra-virgin olive oil contains a metabolo-epigenetic inhibitor of cancer stem cells. *Carcinogenesis*. 2018; 39:601–13. <https://doi.org/10.1093/carcin/bgy023> PMID:[29452350](https://pubmed.ncbi.nlm.nih.gov/29452350/)
19. Bertelli M, Kiani AK, Paolacci S, Manara E, Kurti D, Dhuli K, Bushati V, Miertus J, Pangallo D, Baglivo M, Beccari T, Michelini S. Hydroxytyrosol: a natural compound with promising pharmacological activities. *J Biotechnol*. 2020; 309:29–33. <https://doi.org/10.1016/j.jbiotec.2019.12.016> PMID:[31884046](https://pubmed.ncbi.nlm.nih.gov/31884046/)
20. Britton J, Davis R, O'Connor KE. Chemical, physical and biotechnological approaches to the production of the potent antioxidant hydroxytyrosol. *Appl Microbiol Biotechnol*. 2019; 103:5957–74. <https://doi.org/10.1007/s00253-019-09914-9> PMID:[31177312](https://pubmed.ncbi.nlm.nih.gov/31177312/)
21. de Las Hazas MC, Rubio L, Macia A, Motilva MJ. Hydroxytyrosol: emerging trends in potential therapeutic applications. *Curr Pharm Des*. 2018; 24:2157–79. <https://doi.org/10.2174/1381612824666180522110314> PMID:[29788874](https://pubmed.ncbi.nlm.nih.gov/29788874/)
22. Cuyàs E, Castillo D, Llorach-Parés L, Lozano-Sánchez J, Verdura S, Nonell-Canals A, Brunet J, Bosch-Barrera J, Joven J, Valdés R, Sanchez-Martinez M, Segura-Carretero A, Menendez JA. Computational de-orphanization of the olive oil biophenol oleacein: discovery of new metabolic and epigenetic targets. *Food Chem Toxicol*. 2019; 131:110529. <https://doi.org/10.1016/j.fct.2019.05.037> PMID:[31150784](https://pubmed.ncbi.nlm.nih.gov/31150784/)
23. Menendez JA, Alarcón T. Metabostemness: a new cancer hallmark. *Front Oncol*. 2014; 4:262. <https://doi.org/10.3389/fonc.2014.00262> PMID:[25325014](https://pubmed.ncbi.nlm.nih.gov/25325014/)
24. Ryall JG, Cliff T, Dalton S, Sartorelli V. Metabolic reprogramming of stem cell epigenetics. *Cell Stem Cell*. 2015; 17:651–62. <https://doi.org/10.1016/j.stem.2015.11.012> PMID:[26637942](https://pubmed.ncbi.nlm.nih.gov/26637942/)
25. Menendez JA, Corominas-Faja B, Cuyàs E, García MG, Fernández-Arroyo S, Fernández AF, Joven J, Fraga MF, Alarcón T. Oncometabolic nuclear reprogramming of cancer stemness. *Stem Cell Reports*. 2016; 6:273–83. <https://doi.org/10.1016/j.stemcr.2015.12.012> PMID:[26876667](https://pubmed.ncbi.nlm.nih.gov/26876667/)
26. Perusina Lanfranca M, Thompson JK, Bednar F, Halbrook C, Lyssiotis C, Levi B, Frankel TL. Metabolism and epigenetics of pancreatic cancer stem cells. *Semin Cancer Biol*. 2019; 57:19–26. <https://doi.org/10.1016/j.semcancer.2018.09.008> PMID:[30273655](https://pubmed.ncbi.nlm.nih.gov/30273655/)
27. Crispo F, Condelli V, Lepore S, Notarangelo T, Sgambato A, Esposito F, Maddalena F, Landriscina M. Metabolic dysregulations and epigenetics: a bidirectional interplay that drives tumor progression. *Cells*. 2019; 8:798. <https://doi.org/10.3390/cells8080798> PMID:[31366176](https://pubmed.ncbi.nlm.nih.gov/31366176/)
28. Dai Z, Ramesh V, Locasale JW. The evolving metabolic landscape of chromatin biology and epigenetics. *Nat Rev Genet*. 2020. <https://doi.org/10.1038/s41576-020-0270-8>
29. Dontu G, Abdallah WM, Foley JM, Jackson KW, Clarke MF, Kawamura MJ, Wicha MS. In vitro propagation and transcriptional profiling of human mammary stem/progenitor cells. *Genes Dev*. 2003; 17:1253–70. <https://doi.org/10.1101/gad.1061803> PMID:[12756227](https://pubmed.ncbi.nlm.nih.gov/12756227/)
30. Dontu G, Wicha MS. Survival of mammary stem cells in suspension culture: implications for stem cell biology and neoplasia. *J Mammary Gland Biol Neoplasia*. 2005; 10:75–86. <https://doi.org/10.1007/s10911-005-2542-5> PMID:[15886888](https://pubmed.ncbi.nlm.nih.gov/15886888/)
31. Ginestier C, Hur MH, Charafe-Jauffret E, Monville F, Dutcher J, Brown M, Jacquemier J, Viens P, Kleer CG, Liu S, Schott A, Hayes D, Birnbaum D, et al. ALDH1 is a marker of normal and Malignant human mammary stem cells and a predictor of poor clinical outcome. *Cell Stem Cell*. 2007; 1:555–67. <https://doi.org/10.1016/j.stem.2007.08.014> PMID:[18371393](https://pubmed.ncbi.nlm.nih.gov/18371393/)
32. Korkaya H, Paulson A, Iovino F, Wicha MS. HER2 regulates the mammary stem/progenitor cell population driving tumorigenesis and invasion. *Oncogene*. 2008; 27:6120–30. <https://doi.org/10.1038/onc.2008.207> PMID:[18591932](https://pubmed.ncbi.nlm.nih.gov/18591932/)
33. Manuel Iglesias J, Beloqui I, Garcia-Garcia F, Leis O, Vazquez-Martin A, Eguiara A, Cufí S, Pavon A, Menendez JA, Dopazo J, Martín AG. Mammosphere formation in breast carcinoma cell lines depends upon expression of e-cadherin. *PLoS One*. 2013; 8:e77281.

- <https://doi.org/10.1371/journal.pone.0077281>  
PMID:24124614
34. Weiswald LB, Bellet D, Dangles-Marie V. Spherical cancer models in tumor biology. *Neoplasia*. 2015; 17:1–15.  
<https://doi.org/10.1016/j.neo.2014.12.004>  
PMID:25622895
35. Brooks MD, Burness ML, Wicha MS. Therapeutic implications of cellular heterogeneity and plasticity in breast cancer. *Cell Stem Cell*. 2015; 17:260–71.  
<https://doi.org/10.1016/j.stem.2015.08.014>  
PMID:26340526
36. Cuyàs E, Martin-Castillo B, Bosch-Barrera J, Menendez JA. Metformin inhibits RANKL and sensitizes cancer stem cells to denosumab. *Cell Cycle*. 2017; 16:1022–28.  
<https://doi.org/10.1080/15384101.2017.1310353>  
PMID:28387573
37. Cuyàs E, Gumuzio J, Verdura S, Brunet J, Bosch-Barrera J, Martin-Castillo B, Alarcón T, Encinar JA, Martin ÁG, Menendez JA. The LSD1 inhibitor iadademstat (ORY-1001) targets SOX2-driven breast cancer stem cells: a potential epigenetic therapy in luminal-B and HER2-positive breast cancer subtypes. *Aging (Albany NY)*. 2020; 12:4794–814.  
<https://doi.org/10.18632/aging.102887>  
PMID:32191225
38. Blum W, Pecze L, Felley-Bosco E, Wu L, de Perrot M, Schwaller B. Stem cell factor-based identification and functional properties of in vitro-selected subpopulations of Malignant mesothelioma cells. *Stem Cell Reports*. 2017; 8:1005–17.  
<https://doi.org/10.1016/j.stemcr.2017.02.005>  
PMID:28285878
39. Kolev VN, Tam WF, Wright QG, McDermott SP, Vidal CM, Shapiro IM, Xu Q, Wicha MS, Pachter JA, Weaver DT. Inhibition of FAK kinase activity preferentially targets cancer stem cells. *Oncotarget*. 2017; 8:51733–47.  
<https://doi.org/10.18632/oncotarget.18517>  
PMID:28881682
40. Navas T, Pfister TD, Colantonio S, Aziz A, Dieckman L, Saul RG, Kaczmarczyk J, Borgel S, Alcoser SY, Hollingshead MG, Lee YH, Bottaro DP, Hiltke T, et al. Novel antibody reagents for characterization of drug- and tumor microenvironment-induced changes in epithelial-mesenchymal transition and cancer stem cells. *PLoS One*. 2018; 13:e0199361.  
<https://doi.org/10.1371/journal.pone.0199361>  
PMID:29928062
41. Maes T, Mascaró C, Tirapu I, Estiarte A, Ciceri F, Lunardi S, Guibourt N, Perdonés A, Lufino MM, Somerville TC, Wiseman DH, Duy C, Melnick A, et al. ORY-1001, a potent and selective covalent KDM1A inhibitor, for the treatment of acute leukemia. *Cancer Cell*. 2018; 33:495–511.e12.  
<https://doi.org/10.1016/j.ccell.2018.02.002>  
PMID:29502954
42. Martin-Castillo B, Lopez-Bonet E, Cuyàs E, Viñas G, Pernas S, Dorca J, Menendez JA. Cancer stem cell-driven efficacy of trastuzumab (Herceptin): towards a reclassification of clinically HER2-positive breast carcinomas. *Oncotarget*. 2015; 6:32317–38.  
<https://doi.org/10.18632/oncotarget.6094>  
PMID:26474458
43. Rodrigues T, Reker D, Schneider P, Schneider G. Counting on natural products for drug design. *Nat Chem*. 2016; 8:531–41.  
<https://doi.org/10.1038/nchem.2479> PMID:27219696
44. Trujillo M, Mateos R, Collantes de Teran L, Espartero JL, Cert R, Jover M, Alcudia F, Bautista J, Cert A, Parrado J. Lipophilic hydroxytyrosyl esters. Antioxidant activity in lipid matrices and biological systems. *J Agric Food Chem*. 2006; 54:3779–85.  
<https://doi.org/10.1021/jf060520z> PMID:16719496
45. Grasso S, Siracusa L, Spatafora C, Renis M, Tringali C. Hydroxytyrosol lipophilic analogues: enzymatic synthesis, radical scavenging activity and DNA oxidative damage protection. *Bioorg Chem*. 2007; 35:137–52.  
<https://doi.org/10.1016/j.bioorg.2006.09.003>  
PMID:17078995
46. Calderón-Montaña JM, Madrona A, Burgos-Morón E, Orta ML, Mateos S, Espartero JL, López-Lázaro M. Selective cytotoxic activity of new lipophilic hydroxytyrosol alkyl ether derivatives. *J Agric Food Chem*. 2013; 61:5046–53.  
<https://doi.org/10.1021/jf400796p>  
PMID:23638972
47. Reyes JJ, De La Cruz JP, Muñoz-Marin J, Guerrero A, Lopez-Villodres JA, Madrona A, Espartero JL, Gonzalez-Correa JA. Antiplatelet effect of new lipophilic hydroxytyrosol alkyl ether derivatives in human blood. *Eur J Nutr*. 2013; 52:591–99.  
<https://doi.org/10.1007/s00394-012-0361-1>  
PMID:22584413
48. Belmonte-Reche E, Martínez-García M, Peñalver P, Gómez-Pérez V, Lucas R, Gamarro F, Pérez-Victoria JM, Morales JC. Tyrosol and hydroxytyrosol derivatives as antitrypanosomal and antileishmanial agents. *Eur J Med Chem*. 2016; 119:132–40.  
<https://doi.org/10.1016/j.ejmech.2016.04.047>  
PMID:27155468
49. Funakoshi-Tago M, Sakata T, Fujiwara S, Sakakura A, Sugai T, Tago K, Tamura H. Hydroxytyrosol butyrate

- inhibits 6-OHDA-induced apoptosis through activation of the Nrf2/HO-1 axis in SH-SY5Y cells. *Eur J Pharmacol.* 2018; 834:246–56.  
<https://doi.org/10.1016/j.ejphar.2018.07.043>  
PMID:[30053409](https://pubmed.ncbi.nlm.nih.gov/30053409/)
50. Cuyàs E, Verdura S, Lozano-Sánchez J, Viciano I, Llorach-Parés L, Nonell-Canals A, Bosch-Barrera J, Brunet J, Segura-Carretero A, Sanchez-Martinez M, Encinar JA, Menendez JA. The extra virgin olive oil phenolic oleacein is a dual substrate-inhibitor of catechol-O-methyltransferase. *Food Chem Toxicol.* 2019; 128:35–45.  
<https://doi.org/10.1016/j.fct.2019.03.049>  
PMID:[30935952](https://pubmed.ncbi.nlm.nih.gov/30935952/)
51. Cuyàs E, Gumuzio J, Lozano-Sánchez J, Carreras D, Verdura S, Llorach-Parés L, Sanchez-Martinez M, Selga E, Pérez GJ, Scornik FS, Brugada R, Bosch-Barrera J, Segura-Carretero A, et al. Extra virgin olive oil contains a phenolic inhibitor of the histone demethylase LSD1/KDM1A. *Nutrients.* 2019; 11:1656.  
<https://doi.org/10.3390/nu11071656>  
PMID:[31331073](https://pubmed.ncbi.nlm.nih.gov/31331073/)
52. Verdura S, Cuyàs E, Lozano-Sánchez J, Bastidas-Velez C, Llorach-Parés L, Fernández-Arroyo S, Hernández-Aguilera A, Joven J, Nonell-Canals A, Bosch-Barrera J, Martin-Castillo B, Vellon L, Sanchez-Martinez M, et al. An olive oil phenolic is a new chemotype of mutant isocitrate dehydrogenase 1 (IDH1) inhibitors. *Carcinogenesis.* 2019; 40:27–40.  
<https://doi.org/10.1093/carcin/bgy159>  
PMID:[30428017](https://pubmed.ncbi.nlm.nih.gov/30428017/)
53. Alvarez G, Aguirre-López B, Varela J, Cabrera M, Merlino A, López GV, Lavaggi ML, Porcal W, Di Maio R, González M, Cerecetto H, Cabrera N, Pérez-Montfort R, et al. Massive screening yields novel and selective trypanosoma cruzi triosephosphate isomerase dimer-interface-irreversible inhibitors with anti-trypanosomal activity. *Eur J Med Chem.* 2010; 45:5767–72.  
<https://doi.org/10.1016/j.ejmech.2010.09.034>  
PMID:[20889239](https://pubmed.ncbi.nlm.nih.gov/20889239/)
54. Cuyàs E, Verdura S, Llorach-Pares L, Fernández-Arroyo S, Luciano-Mateo F, Cabré N, Stursa J, Werner L, Martin-Castillo B, Viollet B, Neuzil J, Joven J, Nonell-Canals A, et al. Metformin directly targets the H3K27me3 demethylase KDM6A/UTX. *Aging Cell.* 2018; 17:e12772.  
<https://doi.org/10.1111/acer.12772>  
PMID:[29740925](https://pubmed.ncbi.nlm.nih.gov/29740925/)

## SUPPLEMENTARY MATERIALS

### Supplementary Figures

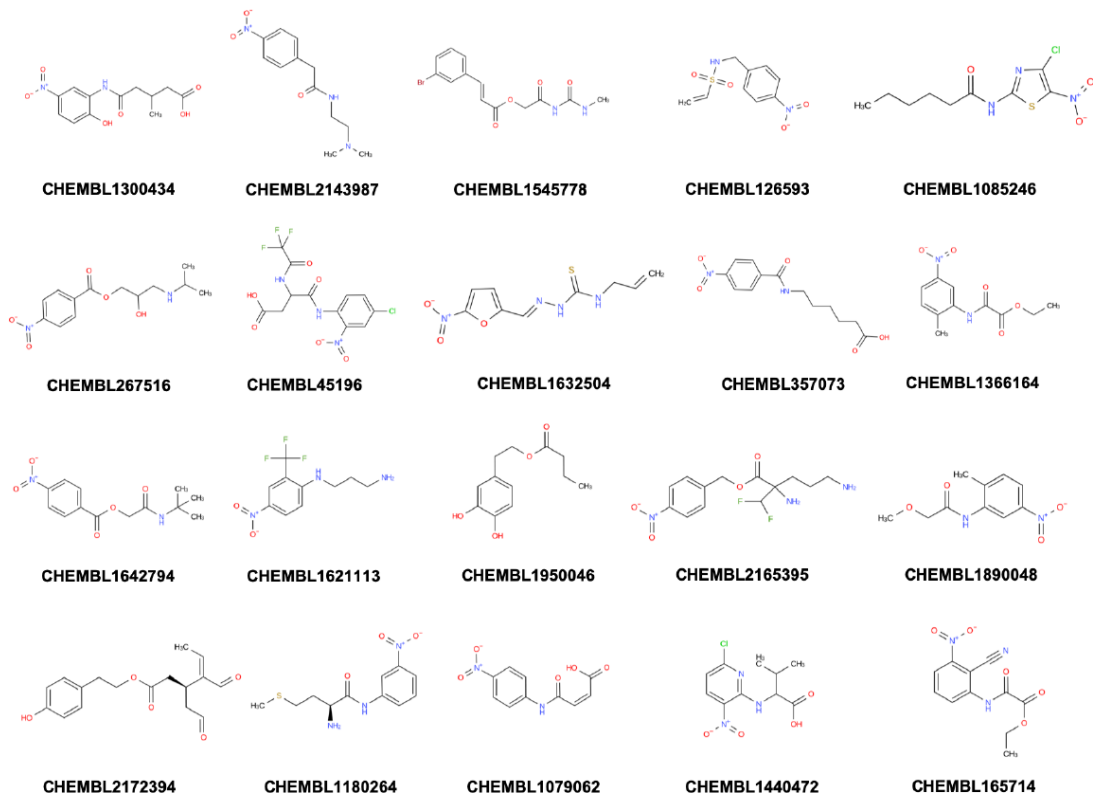

Supplementary Figure 1. CHEMBL structures of the computationally-predicted oleacein mimetics.

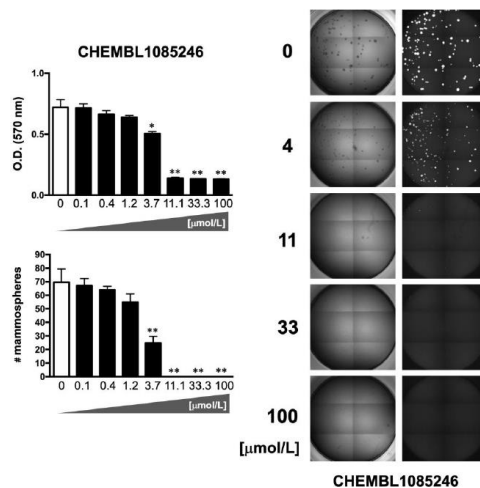

Supplementary Figure 2. *Top panels.* MTT reduction-based measurement of cell viability is expressed as percentage uptake (OD<sub>570</sub>) relative to untreated controls (=100% cell viability). *Bottom panels.* Representative microscope images (×2.5 magnification) of mammospheres formed by MDA-MB-436 cells growing in sphere medium for 6 days in the absence or presence of graded concentrations of CHEMBL1085246. The number of mammospheres (>100 μm diameter) is expressed as means (columns) ± SD (bars). \*P < 0.05 and \*\*P < 0.005, statistically significant differences from the untreated (control) group.



## Supplementary Tables

Please browse Full Text version to see the data of Supplementary Tables 6 and 7.

**Supplementary Table 1. Docking binding energies and MM/GBSA-based energy rescoring calculations of oleacein against mTOR and DNMT.**

| Cavity                  | Docking<br>$\Delta G$ kcal/mol | MM/GBSA<br>$\Delta G$ kcal/mol | Target / PDBID |
|-------------------------|--------------------------------|--------------------------------|----------------|
| Crystallographic cavity | -7.1/-7.1                      | -26.8226                       | mTOR / 4JT6    |
| Cavity1                 | -7.3/-6.9                      | -17.155                        | mTOR / 4JT6    |
| Cavity4                 | -7.6/-7.8                      | -36.9931                       | mTOR / 4JT6    |
| Cavity8                 | -7.4/-7.3                      | -21.8981                       | mTOR / 4JT6    |
| Crystallographic cavity | -7.9/-7.6                      | -30.567                        | DNMT / 4WXX    |
| Cavity1                 | -7.7/-7.7                      | -25.2792                       | DNMT / 4WXX    |
| Cavity2                 | -7.2/-7.2                      | -36.5163                       | DNMT / 4WXX    |
| Cavity3                 | -7.3/-7.3                      | -34.0772                       | DNMT / 4WXX    |

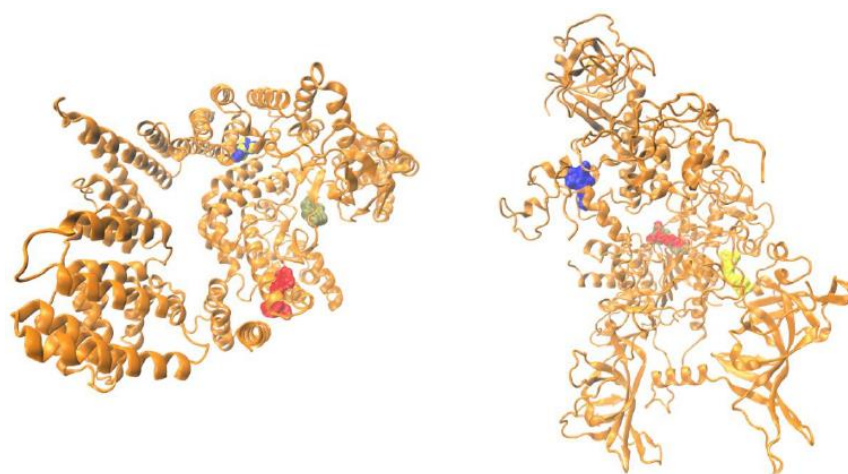

Graphical representation of parental oleacein bound to several cavities of mTOR (4JT6, *left*) and DNMT (4WXX, *right*). Oleacein is colored in gold. In the case of mTOR, oleacein poses at cavities 1, 4, and 8, colored in blue, red, and yellow, respectively. In the case of DNMT, oleacein poses at cavities 1, 2, and 3, colored in blue, red, and yellow, respectively.

**Supplementary Table 2. Docking binding energies of oleacein mimetics against the crystallographic cavities of mTOR and DNMT.**

| Oleacein mimetic | Target/ PDBID | $\Delta G$ kcal/mol<br>R0 / R1 | Target / PDBID | $\Delta G$ kcal/mol<br>R0 / R1 |
|------------------|---------------|--------------------------------|----------------|--------------------------------|
| CHEMBL2172394    | mTOR / 4JT6   | -6.6 / -6.9                    | DNMT / 4WXX    | -6.9 / -7.1                    |
| CHEMBL1085246    | mTOR / 4JT6   | -6.5 / -6.7                    | DNMT / 4WXX    | -7.6 / -7.5                    |
| CHEMBL357073     | mTOR / 4JT6   | -7.3 / -7.2                    | DNMT / 4WXX    | -7.8 / -7.6                    |
| CHEMBL1632504    | mTOR / 4JT6   | -5.9 / -6.0                    | DNMT / 4WXX    | -7.3 / -7.2                    |
| CHEMBL126593     | mTOR / 4JT6   | -6.7 / -6.8                    | DNMT / 4WXX    | -6.8 / -6.8                    |
| CHEMBL1950046    | mTOR / 4JT6   | -6.7 / -6.7                    | DNMT / 4WXX    | -6.7 / -6.7                    |
| CHEMBL1440472    | mTOR / 4JT6   | -6.1 / -6.1                    | DNMT / 4WXX    | -7.0 / -7.0                    |
| CHEMBL1300434    | mTOR / 4JT6   | -6.6 / -6.6                    | DNMT / 4WXX    | -7.5 / -7.5                    |
| CHEMBL1890048    | mTOR / 4JT6   | -6.3 / -6.4                    | DNMT / 4WXX    | -6.8 / -6.8                    |
| CHEMBL1180264    | mTOR / 4JT6   | -6.1 / -6.1                    | DNMT / 4WXX    | -7.3 / -7.4                    |
| CHEMBL165714     | mTOR / 4JT6   | -6.3 / -6.3                    | DNMT / 4WXX    | -7.3 / -7.3                    |
| CHEMBL1621113    | mTOR / 4JT6   | -6.7 / -6.6                    | DNMT / 4WXX    | -7.0 / -7.2                    |

|               |             |             |             |             |
|---------------|-------------|-------------|-------------|-------------|
| CHEMBL1079062 | mTOR / 4JT6 | -7.2 / -7.2 | DNMT / 4WXX | -7.7 / -7.7 |
| CHEMBL267516  | mTOR / 4JT6 | -6.6 / -6.7 | DNMT / 4WXX | -7.3 / -7.1 |
| CHEMBL154778  | mTOR / 4JT6 | -8.8 / -8.6 | DNMT / 4WXX | -8.1 / -8.1 |
| CHEMBL1366164 | mTOR / 4JT6 | -6.9 / -6.9 | DNMT / 4WXX | -7.4 / -7.4 |
| CHEMBL1642794 | mTOR / 4JT6 | -7.0 / -7.0 | DNMT / 4WXX | -7.6 / -7.6 |
| CHEMBL2165395 | mTOR / 4JT6 | -6.5 / -6.4 | DNMT / 4WXX | -7.3 / -7.3 |
| CHEMBL45196   | mTOR / 4JT6 | -7.1 / -6.6 | DNMT / 4WXX | -8.3 / -8.3 |
| CHEMBL2143987 | mTOR / 4JT6 | -6.2 / -6.2 | DNMT / 4WXX | -6.9 / -7.0 |

Each calculation was performed twice (R0, R1) to avoid false positives. Differences less than 1 kcal/mol are negligible.

**Supplementary Table 3. Docking binding energies of oleacein mimetics against the best cavity of mTOR and DNMT shared with oleacein.**

| Oleacein mimetic | Cavity  | Target / PDBID | $\Delta G$          |         | Target / PDBID | $\Delta G$ kcal/mol<br>R0 / R1 |
|------------------|---------|----------------|---------------------|---------|----------------|--------------------------------|
|                  |         |                | kcal/mol<br>R0 / R1 |         |                |                                |
| CHEMBL2172394    | Cavity4 | mTOR / 4JT6    | -7.8 / -7.8         | Cavity3 | DNMT / 4WXX    | -7.3 / -7.4                    |
| CHEMBL1085246    | Cavity4 | mTOR / 4JT6    | -7.6 / -7.4         | Cavity2 | DNMT / 4WXX    | -7.0 / -7.0                    |
| CHEMBL357073     | Cavity4 | mTOR / 4JT6    | -7.7 / -7.6         | Cavity2 | DNMT / 4WXX    | -7.4 / -7.6                    |
| CHEMBL1632504    | Cavity8 | mTOR / 4JT6    | -6.8 / -6.7         | Cavity2 | DNMT / 4WXX    | -7.2 / -7.0                    |
| CHEMBL126593     | Cavity1 | mTOR / 4JT6    | -7.1 / -7.1         | Cavity2 | DNMT / 4WXX    | -6.7 / -6.8                    |
| CHEMBL1950046    | Cavity4 | mTOR / 4JT6    | -7.1 / -7.1         | Cavity2 | DNMT / 4WXX    | -6.8 / -6.8                    |
| CHEMBL1440472    | Cavity8 | mTOR / 4JT6    | -7.0 / -7.4         | Cavity4 | DNMT / 4WXX    | -7.0 / -7.0                    |
| CHEMBL1300434    | Cavity8 | mTOR / 4JT6    | -7.2 / -7.2         | Cavity2 | DNMT / 4WXX    | -7.7 / -7.8                    |
| CHEMBL1890048    | Cavity4 | mTOR / 4JT6    | -7.0 / -7.0         | Cavity2 | DNMT / 4WXX    | -6.9 / -6.8                    |
| CHEMBL1180264    | Cavity8 | mTOR / 4JT6    | -7.1 / -6.7         | Cavity2 | DNMT / 4WXX    | -7.3 / -7.4                    |
| CHEMBL165714     | Cavity8 | mTOR / 4JT6    | -7.2 / -7.4         | Cavity1 | DNMT / 4WXX    | -6.9 / -6.8                    |
| CHEMBL1621113    | Cavity1 | mTOR / 4JT6    | -7.0 / -6.5         | Cavity2 | DNMT / 4WXX    | -7.3 / -7.3                    |
| CHEMBL1079062    | Cavity8 | mTOR / 4JT6    | -7.3 / -7.5         | Cavity2 | DNMT / 4WXX    | -7.5 / -7.9                    |
| CHEMBL267516     | Cavity8 | mTOR / 4JT6    | -7.1 / -7.1         | Cavity2 | DNMT / 4WXX    | -7.2 / -7.1                    |
| CHEMBL154778     | Cavity4 | mTOR / 4JT6    | -8.1 / -8.2         | Cavity2 | DNMT / 4WXX    | -8.0 / -7.8                    |
| CHEMBL1366164    | Cavity4 | mTOR / 4JT6    | -7.2 / -7.4         | Cavity2 | DNMT / 4WXX    | -7.2 / -7.2                    |
| CHEMBL1642794    | Cavity1 | mTOR / 4JT6    | -7.8 / -7.6         | Cavity2 | DNMT / 4WXX    | -7.5 / -7.5                    |
| CHEMBL2165395    | Cavity8 | mTOR / 4JT6    | -7.6 / -7.6         | Cavity2 | DNMT / 4WXX    | -7.4 / -7.0                    |
| CHEMBL45196      | Cavity4 | mTOR / 4JT6    | -8.4 / -8.0         | Cavity1 | DNMT / 4WXX    | -8.3 / -8.1                    |
| CHEMBL2143987    | Cavity4 | mTOR / 4JT6    | -7.1 / -6.8         | Cavity3 | DNMT / 4WXX    | -6.9 / -7.0                    |

Each calculation was performed twice (R0, R1) to avoid false positives. Differences less than 1 kcal/mol are negligible.

**Supplementary Table 4. MM/GBSA-based binding energy rescoring calculations over MD simulations of computationally-predicted oleacein mimetics against the crystallographic cavities of mTOR and DNMT.**

| Oleacein mimetic | Target/ PDBID | $\Delta G$ kcal/mol | Target / PDBID | $\Delta G$ kcal/mol |
|------------------|---------------|---------------------|----------------|---------------------|
| CHEMBL2172394    | mTOR / 4JT6   | -18.4177            | DNMT / 4WXX    | -11.8887            |
| CHEMBL1085246    | mTOR / 4JT6   | -27.4436            | DNMT / 4WXX    | -17.8140            |
| CHEMBL357073     | mTOR / 4JT6   | -25.0102            | DNMT / 4WXX    | -28.4676            |
| CHEMBL1632504    | mTOR / 4JT6   | -25.7896            | DNMT / 4WXX    | -38.2609            |
| CHEMBL126593     | mTOR / 4JT6   | -29.2106            | DNMT / 4WXX    | -25.7134            |
| CHEMBL1950046    | mTOR / 4JT6   | -20.2999            | DNMT / 4WXX    | -24.3167            |
| CHEMBL1440472    | mTOR / 4JT6   | -16.6468            | DNMT / 4WXX    | -27.5899            |
| CHEMBL1300434    | mTOR / 4JT6   | -38.7014            | DNMT / 4WXX    | -33.3421            |
| CHEMBL1890048    | mTOR / 4JT6   | -19.6392            | DNMT / 4WXX    | -26.0912            |
| CHEMBL1180264    | mTOR / 4JT6   | -18.2272            | DNMT / 4WXX    | -31.7196            |
| CHEMBL165714     | mTOR / 4JT6   | -16.1321            | DNMT / 4WXX    | -12.1247            |

|               |             |          |             |          |
|---------------|-------------|----------|-------------|----------|
| CHEMBL1621113 | mTOR / 4JT6 | -22.9663 | DNMT / 4WXX | -26.6488 |
| CHEMBL1079062 | mTOR / 4JT6 | -17.4413 | DNMT / 4WXX | -24.2025 |
| CHEMBL267516  | mTOR / 4JT6 | -27.371  | DNMT / 4WXX | -32.8788 |
| CHEMBL154778  | mTOR / 4JT6 | -30.5493 | DNMT / 4WXX | -21.6215 |
| CHEMBL1366164 | mTOR / 4JT6 | -24.3303 | DNMT / 4WXX | -15.4957 |
| CHEMBL1642794 | mTOR / 4JT6 | -24.1435 | DNMT / 4WXX | -16.1264 |
| CHEMBL2165395 | mTOR / 4JT6 | -19.8235 | DNMT / 4WXX | -33.4134 |
| CHEMBL45196   | mTOR / 4JT6 | -27.2624 | DNMT / 4WXX | -24.5175 |
| CHEMBL2143987 | mTOR / 4JT6 | -32.407  | DNMT / 4WXX | -36.4821 |

**Supplementary Table 5. MM/GBSA-based binding energy rescoring calculations over MD simulations of computationally-predicted oleacein mimetics against against the best cavity of mTOR and DNMT shared with oleacein.**

| Oleacein candidate | Cavity  | Target / PDBID | $\Delta G$ kcal/mol | Cavity  | Target / PDBID | $\Delta G$ kcal/mol |
|--------------------|---------|----------------|---------------------|---------|----------------|---------------------|
| CHEMBL2172394      | Cavity4 | mTOR / 4JT6    | -34.392             | Cavity3 | DNMT / 4WXX    | -31.0757            |
| CHEMBL1085246      | Cavity4 | mTOR / 4JT6    | -19.6725            | Cavity2 | DNMT / 4WXX    | -36.9931            |
| CHEMBL357073       | Cavity4 | mTOR / 4JT6    | -33.5462            | Cavity2 | DNMT / 4WXX    | -34.3628            |
| CHEMBL1632504      | Cavity8 | mTOR / 4JT6    | -24.6272            | Cavity2 | DNMT / 4WXX    | -36.6319            |
| CHEMBL126593       | Cavity1 | mTOR / 4JT6    | -26.6329            | Cavity2 | DNMT / 4WXX    | -35.3592            |
| CHEMBL1950046      | Cavity4 | mTOR / 4JT6    | -31.6794            | Cavity2 | DNMT / 4WXX    | -21.7283            |
| CHEMBL1440472      | Cavity8 | mTOR / 4JT6    | -21.2853            | Cavity4 | DNMT / 4WXX    | -29.360             |
| CHEMBL1300434      | Cavity8 | mTOR / 4JT6    | -27.361             | Cavity2 | DNMT / 4WXX    | -33.9773            |
| CHEMBL1890048      | Cavity4 | mTOR / 4JT6    | -21.2089            | Cavity2 | DNMT / 4WXX    | -26.2952            |
| CHEMBL1180264      | Cavity8 | mTOR / 4JT6    | -29.4140            | Cavity2 | DNMT / 4WXX    | -32.3981            |
| CHEMBL165714       | Cavity8 | mTOR / 4JT6    | -21.4634            | Cavity1 | DNMT / 4WXX    | -30.3770            |
| CHEMBL1621113      | Cavity1 | mTOR / 4JT6    | -21.0309            | Cavity2 | DNMT / 4WXX    | -29.3269            |
| CHEMBL1079062      | Cavity8 | mTOR / 4JT6    | -24.7585            | Cavity2 | DNMT / 4WXX    | -24.4205            |
| CHEMBL267516       | Cavity8 | mTOR / 4JT6    | -44.6454            | Cavity2 | DNMT / 4WXX    | -28.1508            |
| CHEMBL154778       | Cavity4 | mTOR / 4JT6    | -25.0387            | Cavity2 | DNMT / 4WXX    | -22.9832            |
| CHEMBL1366164      | Cavity4 | mTOR / 4JT6    | -17.8085            | Cavity2 | DNMT / 4WXX    | -19.6201            |
| CHEMBL1642794      | Cavity1 | mTOR / 4JT6    | -19.439             | Cavity2 | DNMT / 4WXX    | -20.6555            |
| CHEMBL2165395      | Cavity8 | mTOR / 4JT6    | -27.2639            | Cavity2 | DNMT / 4WXX    | -25.8227            |
| CHEMBL45196        | Cavity4 | mTOR / 4JT6    | -17,1961            | Cavity1 | DNMT / 4WXX    | -32,1555            |
| CHEMBL2143987      | Cavity4 | mTOR / 4JT6    | -40.3344            | Cavity3 | DNMT / 4WXX    | -43.6863            |

**Supplementary Table 6. Key interacting residues of oleacein mimetics to the catalytic site of mTOR. Interactions other than electrostatic are highlighted in yellow (possible) or green (reliable).**

**Supplementary Table 7. Key interacting residues of oleacein mimetics to the catalytic site of DNMT. Interactions other than electrostatic are highlighted in yellow (possible) or green (reliable).**
