# Supplementary material for: Mimetics of extra virgin olive oil phenols with anti-cancer stem cell activity
Source: PubMed Central journal article supplement (PMC7695371; doi:10.18632/aging.202154), 2020-11-09
Supplement: aging-12-202154-s001..pdf [file aging-12-202154-s001..pdf]

## SUPPLEMENTARY FIGURES

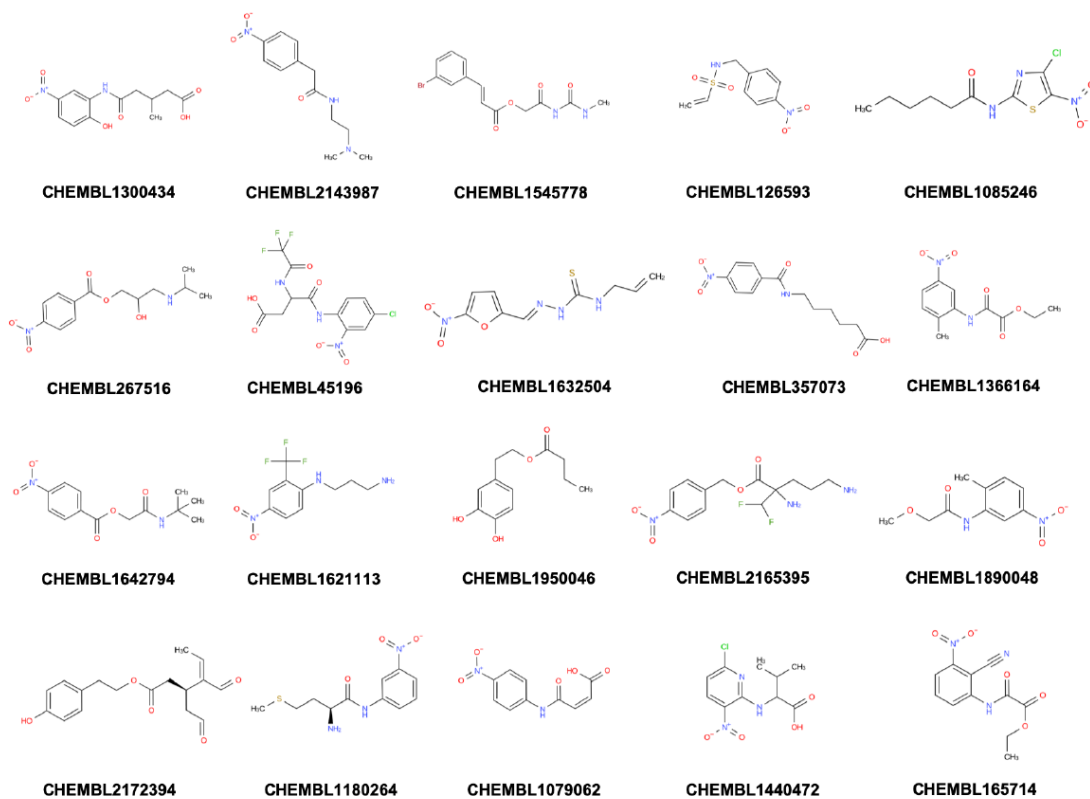

Supplementary Figure 1. CHEMBL structures of the computationally-predicted oleacein mimetics

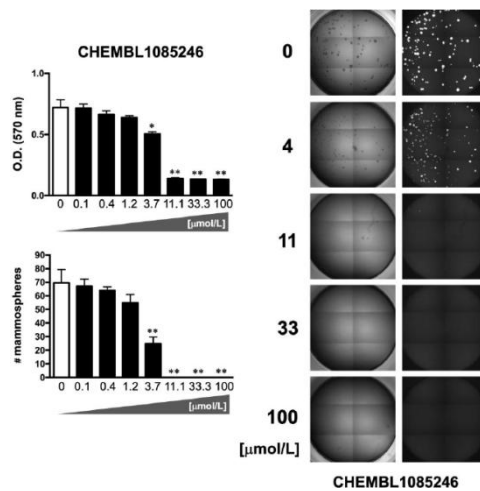

Supplementary Figure 2. *Top panels.* MTT reduction-based measurement of cell viability is expressed as percentage uptake ( $OD_{570}$ ) relative to untreated controls (=100% cell viability). *Bottom panels.* Representative microscope images ( $\times 2.5$  magnification) of mammospheres formed by MDA-MB-436 cells growing in sphere medium for 6 days in the absence or presence of graded concentrations of CHEMBL1085246. The number of mammospheres ( $>100 \mu\text{m}$  diameter) is expressed as means (columns)  $\pm$  SD (bars). \* $P < 0.05$  and \*\* $P < 0.005$ , statistically significant differences from the untreated (control) group.
